# Supplementary material for: An apoptosis-enhancing drug overcomes platinum resistance in a tumour-initiating subpopulation of ovarian cancer
Source: PubMed Central journal article supplement (PMC4532886; doi:10.1038/ncomms8956), 2015-08-03
Supplement: ncomms8956-s1.pdf [file ncomms8956-s1.pdf]

Supplementary Fig. 1

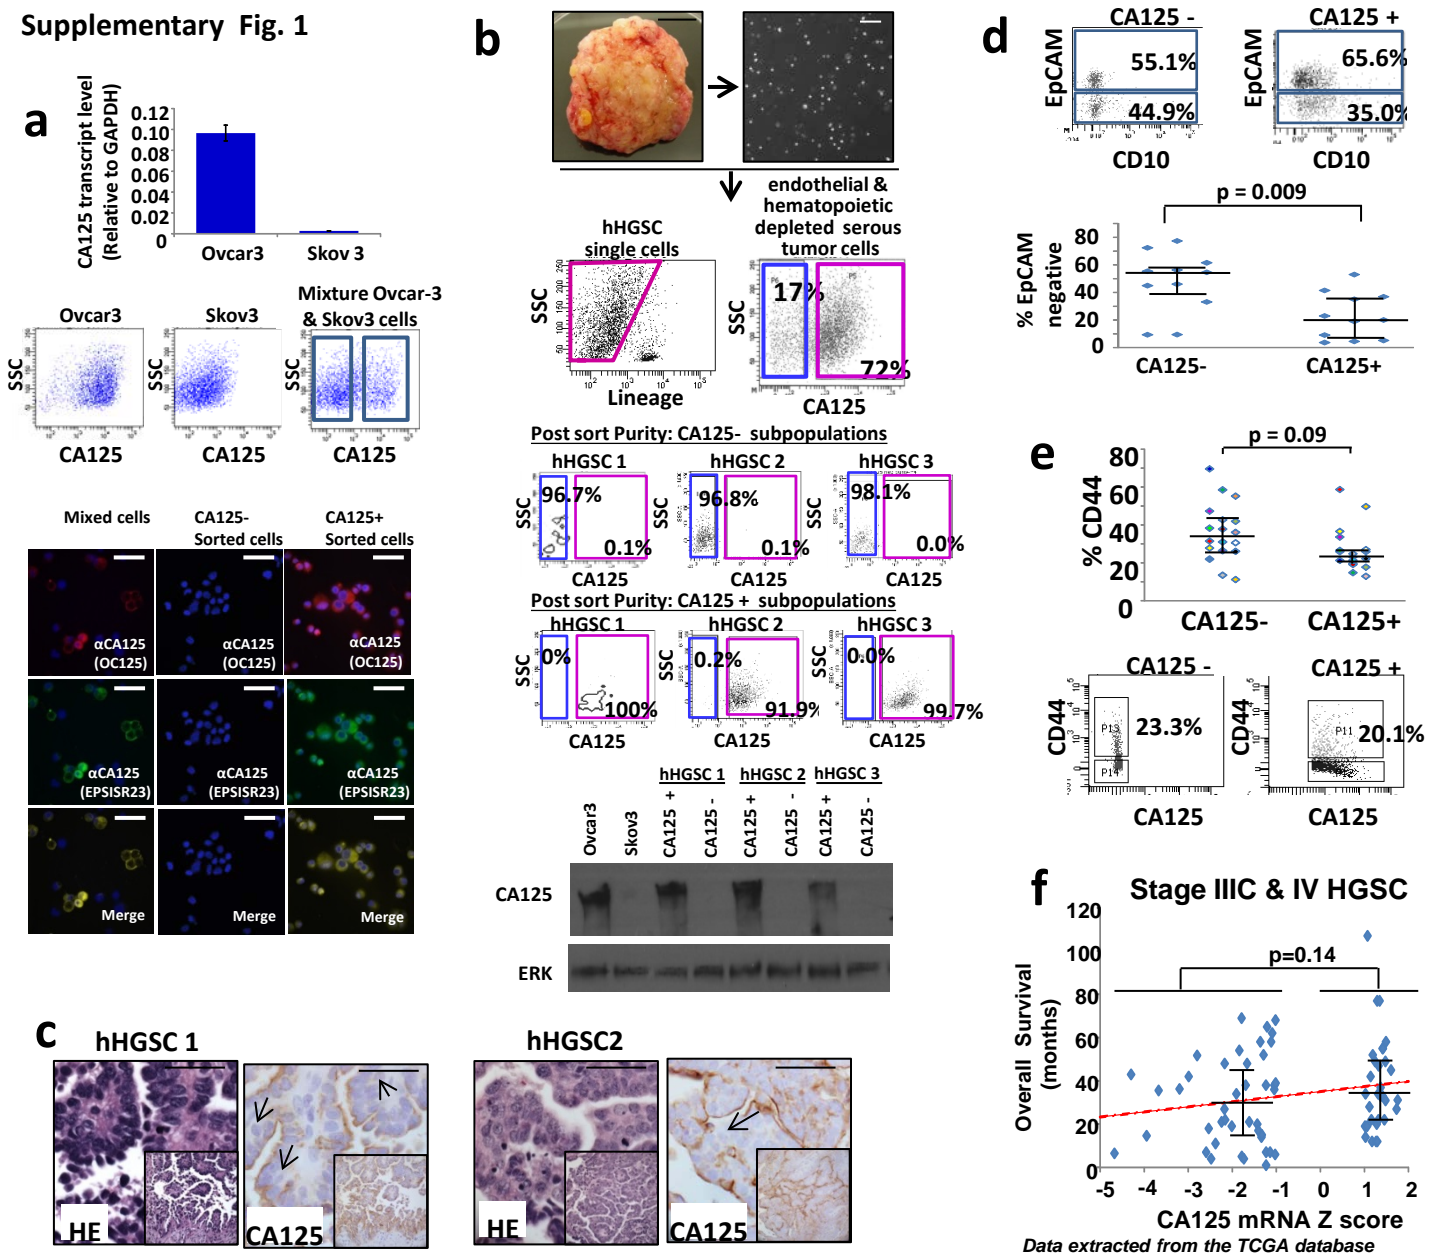

**Supplementary Figure 1. FACS analysis can be used to reliably isolate CA125 positive versus negative cells from high grade serous cancers.** (a) Quantitative-PCR measurement of CA125 transcripts confirmed reports that CA125 is highly expressed in Ovarc-3 but not Skov3 cells. Results are mean  $\pm$  SD, n=3. To validate detection of CA125 antigen, mixed populations of Ovarc-3 and Skov-3 cells were stained with commercially available OC125 antibody, isolated using FACS and cytopun. Appropriate signal was detected by fluorescent microscopy in sorted cell populations. Probing these samples with a second anti-CA125 antibody directed against a different epitope of the antigen confirmed the accuracy of this isolation. (b) Human HGSCs were mechanically and enzymatically dissociated to single cells and analyzed by FACS. After elimination of hematopoietic, endothelial and red blood cells using the lineage markers CD31, CD45 and CD235a the proportions of CA125 positive and negative cells were determined. Post-sort purity analysis showed accurate separation of these cellular subpopulations (n=3) confirmed by western blot. Scale bars equal 5 mm for tumor and 100  $\mu$ m for cells. (c) Immunostaining of human HGSCs confirmed presence of CA125 negative cells (arrows). Scale bars equal 5 mm for tumor and 100  $\mu$ m for cells. (d) FACS analysis of CA125 subpopulations co-stained with the epithelial marker EpCAM and Müllerian stromal marker CD10 demonstrates the presence of cells expressing epithelial and/or stromal marker in each fraction. Results are median  $\pm$  interquartile range [IQR], n=11. (e) Analysis of CD44 expression by FACS revealed the presence of CD44 positive cells in both the CA125 negative and CA125 positive HGSC subpopulations. Results are median  $\pm$  IQR, n=16. (f) Analysis of 73 stage IIIc and IV HGSC from the TCGA database demonstrated a trend toward shorter overall survival in patients with lower CA125 mRNA levels in their tumors. Patients with mRNA Z score levels above or below 1 were included in this analysis. Results are median  $\pm$  IQR.

# Supplementary Fig. 2

**a**

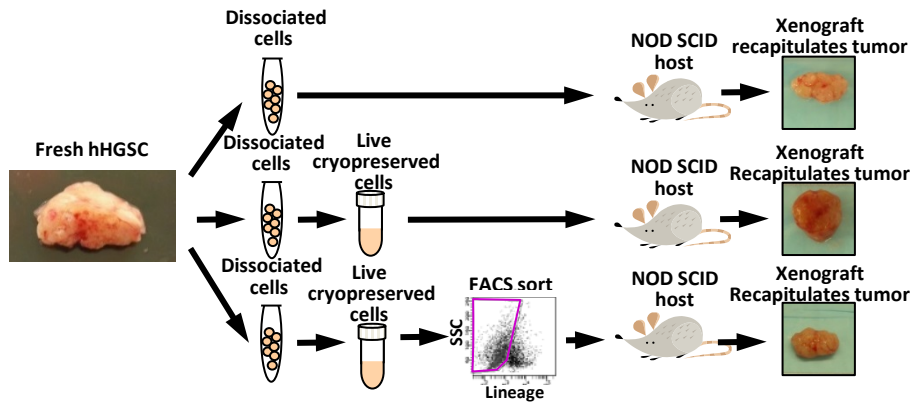

**b**

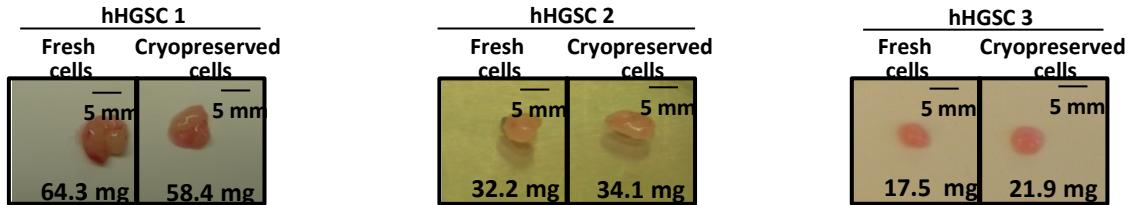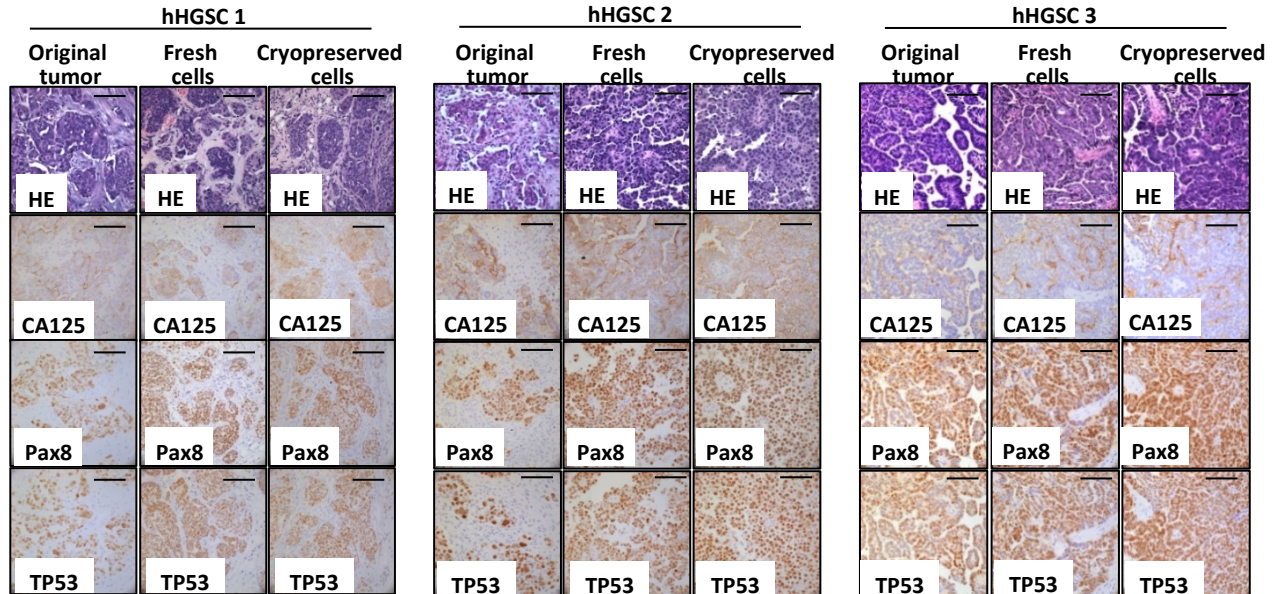

**c**

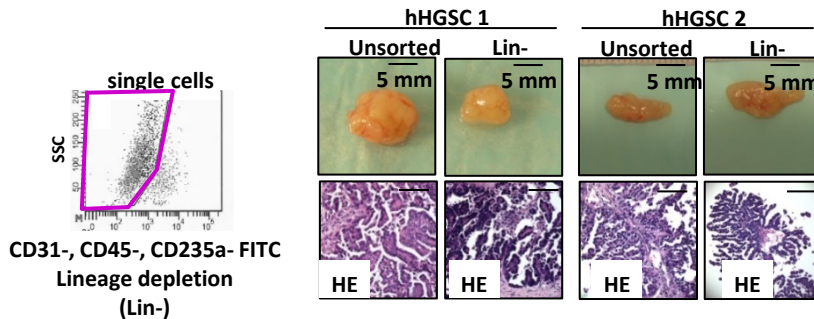

**Supplementary Figure 2. Live-bank cryopreservation did not alter the growth characteristics of primary human high-grade serous tumor cells. (a)** Freshly dissociated, live-banked or live-banked and then sorted primary human HGSC cells gave rise to xenografts in vivo. **(b)** Tumors generated from equal numbers of fresh vs matched live-banked cryopreserved cells demonstrated similar size, serous histology and marker expression profile (n=3). **(c)** Equal numbers of cryopreserved or cryopreserved and lineage depleted FACS sorted serous tumor cells were injected in vivo (n=2). Results demonstrate that serous tumors could be generated from cryopreserved and FACS sorted cells. Scale bars equal 100  $\mu$ m unless noted.

## Supplementary Fig. 3

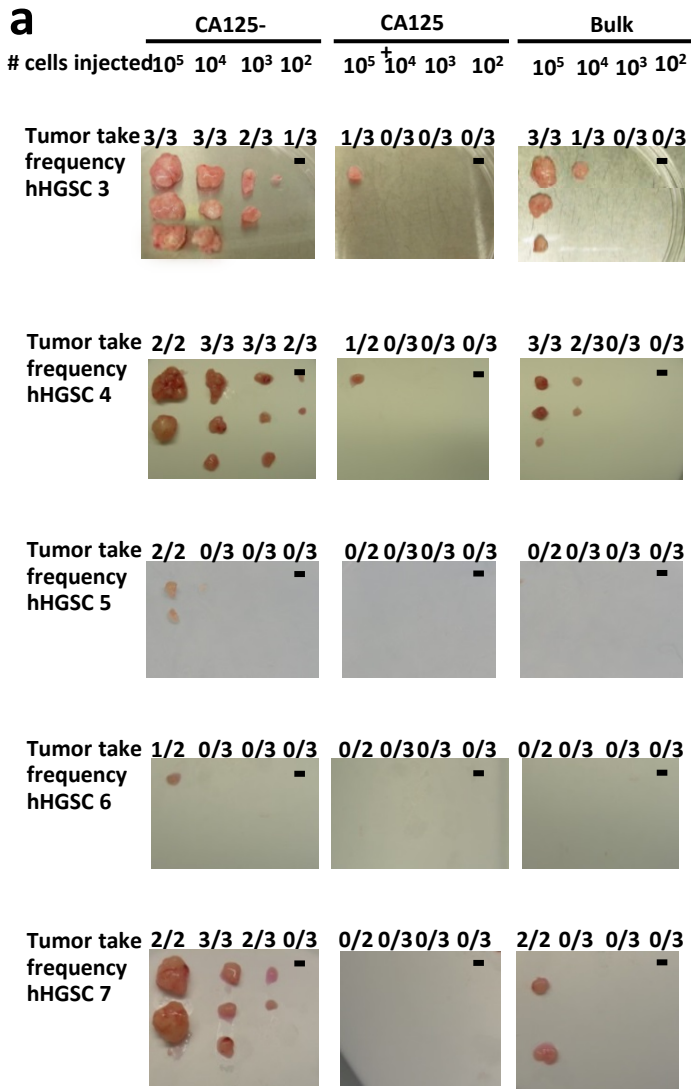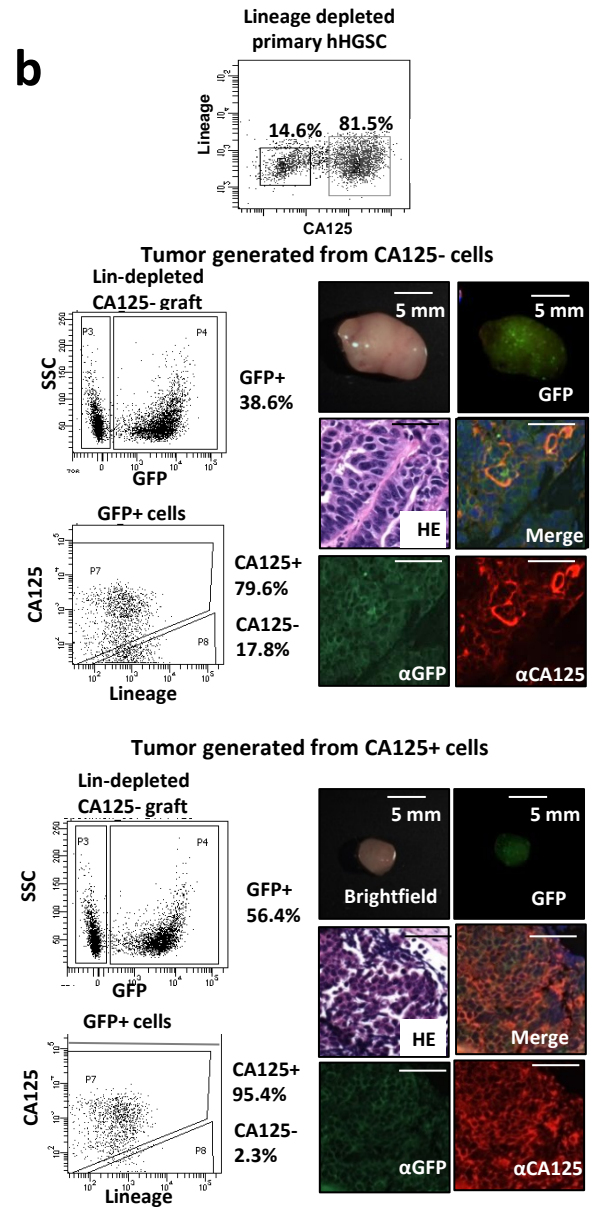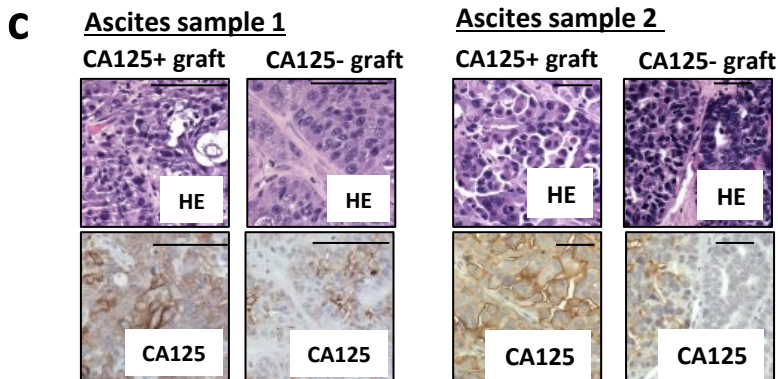

**Supplementary Figure 3. The CA125 negative tumor cells efficiently initiate the tumor and undergo multi-lineage differentiation in vivo. (a)** Limiting dilution assays confirmed CA125 negative cells were the cells that initiate serous tumors. Gross tumors generated from 5 other independent chemo-naïve human HGSCs used in this experiment are shown. Scale bars equal 5 mm. **(b)** In vivo lineage tracing experiments on a second independent specimen confirmed that the CA125 negative HGSC subpopulation could differentiate into both CA125 positive and CA125 negative cells, while progeny of CA125 positive cells were predominantly CA125 positive. Scale bars equal 5 mm for gross tumors and 50  $\mu$ m for stained cells. **(c)** In the two ascites samples that exhibited growth from both CA125 subpopulations, tumors generated from the CA125 negative HGSC cells expressed CA125 on some but not all cells while tumors generated from CA125 positive cells uniformly expressed CA125. Scale bars equal 50  $\mu$ m.

## Supplementary Fig. 4

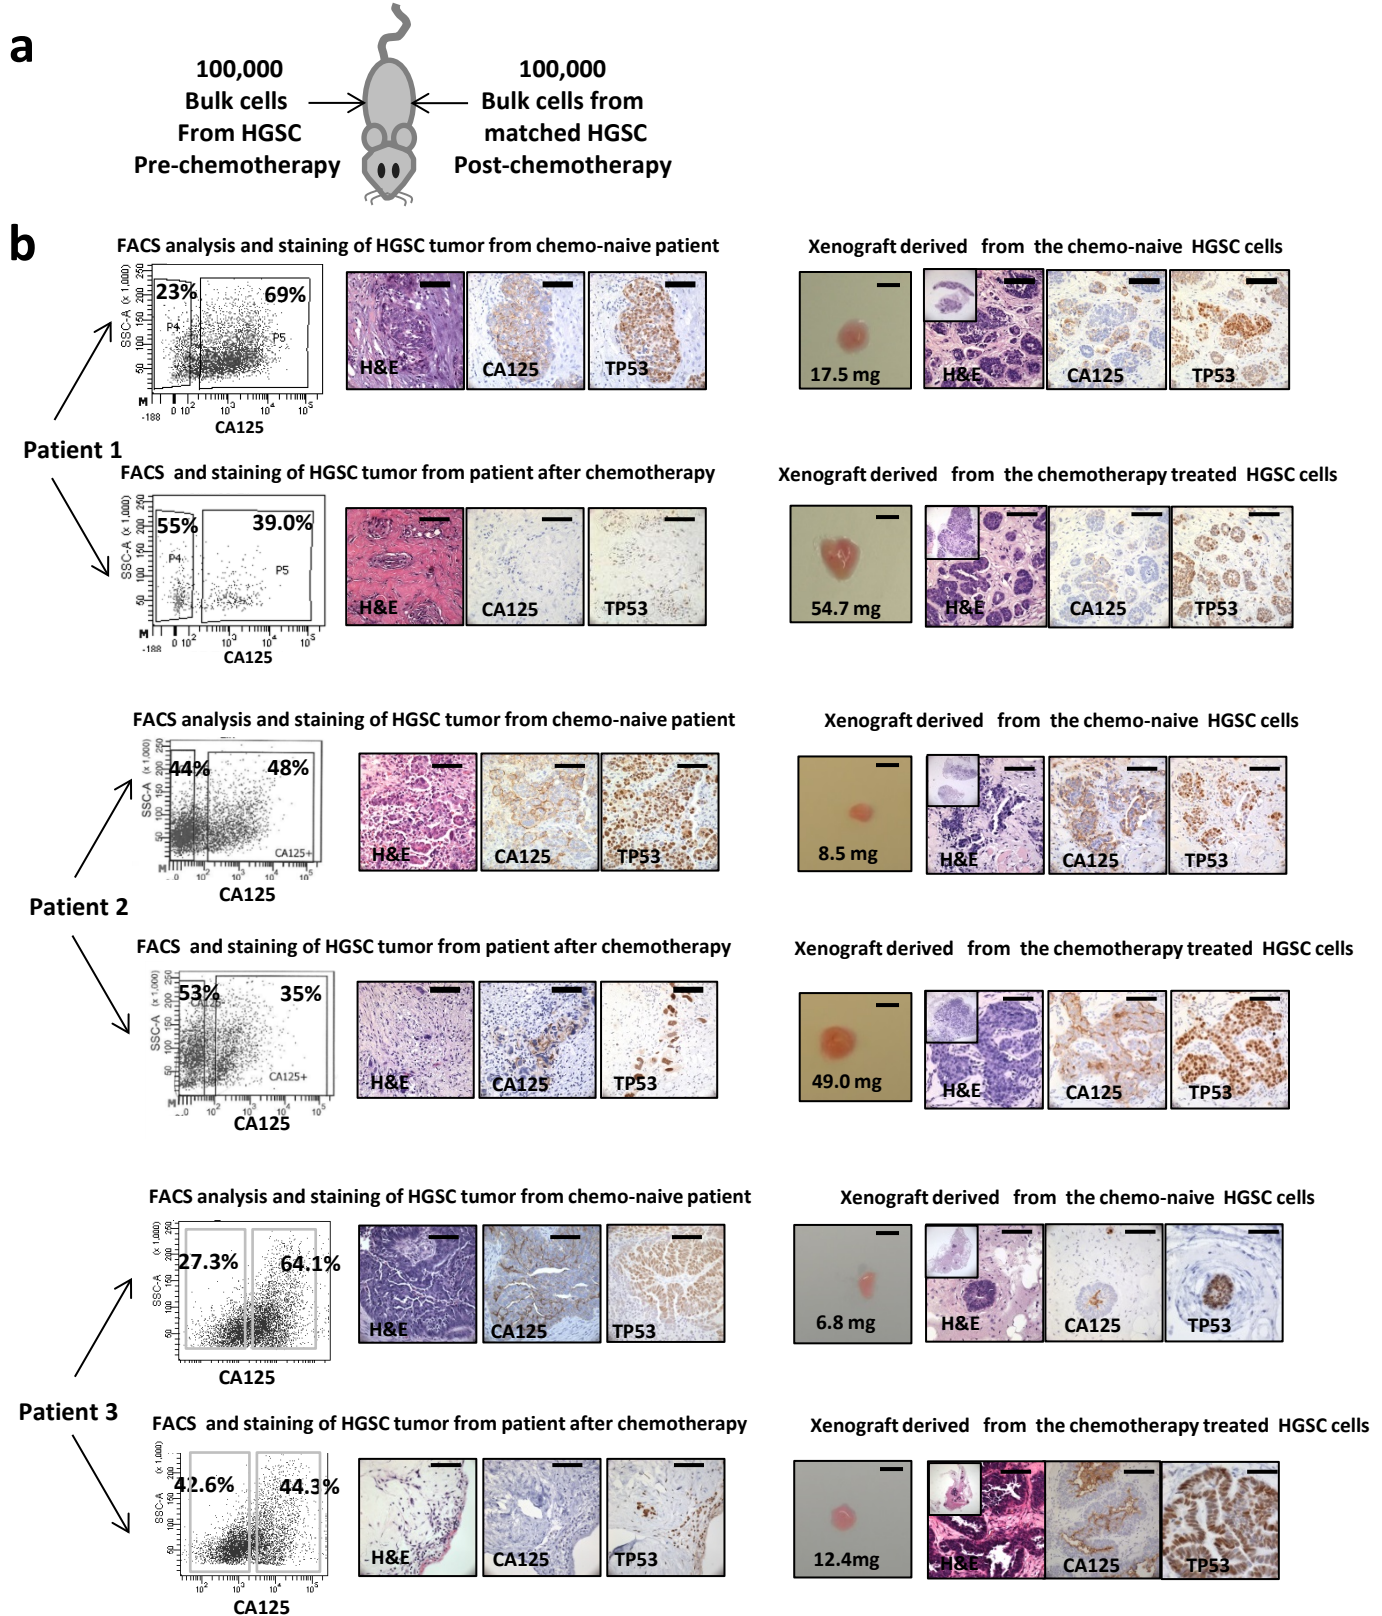

**Supplementary Figure 4. Human high-grade serous cancers have a higher proportion of CA125 negative cells and increased tumor growth capacity after chemotherapy.** (a) Equal numbers of matched enumerated bulk tumor cells (100,000 cells) obtained from the same patient before and after chemotherapy were injected in the subcutaneous space on opposing flanks of an immunocompromised mouse (n=3). (b) Matched human HGSC specimens obtained before and after platinum chemotherapy from 3 independent patients demonstrated an increased proportion of CA125 negative cells following chemotherapy. In each case, larger tumors were generated from the bulk tumor cells harvested after chemotherapy. Presence of tumor in all specimens was confirmed histologically and by staining for TP53. Scale bars equal 100  $\mu$ m.

## Supplementary Fig. 5

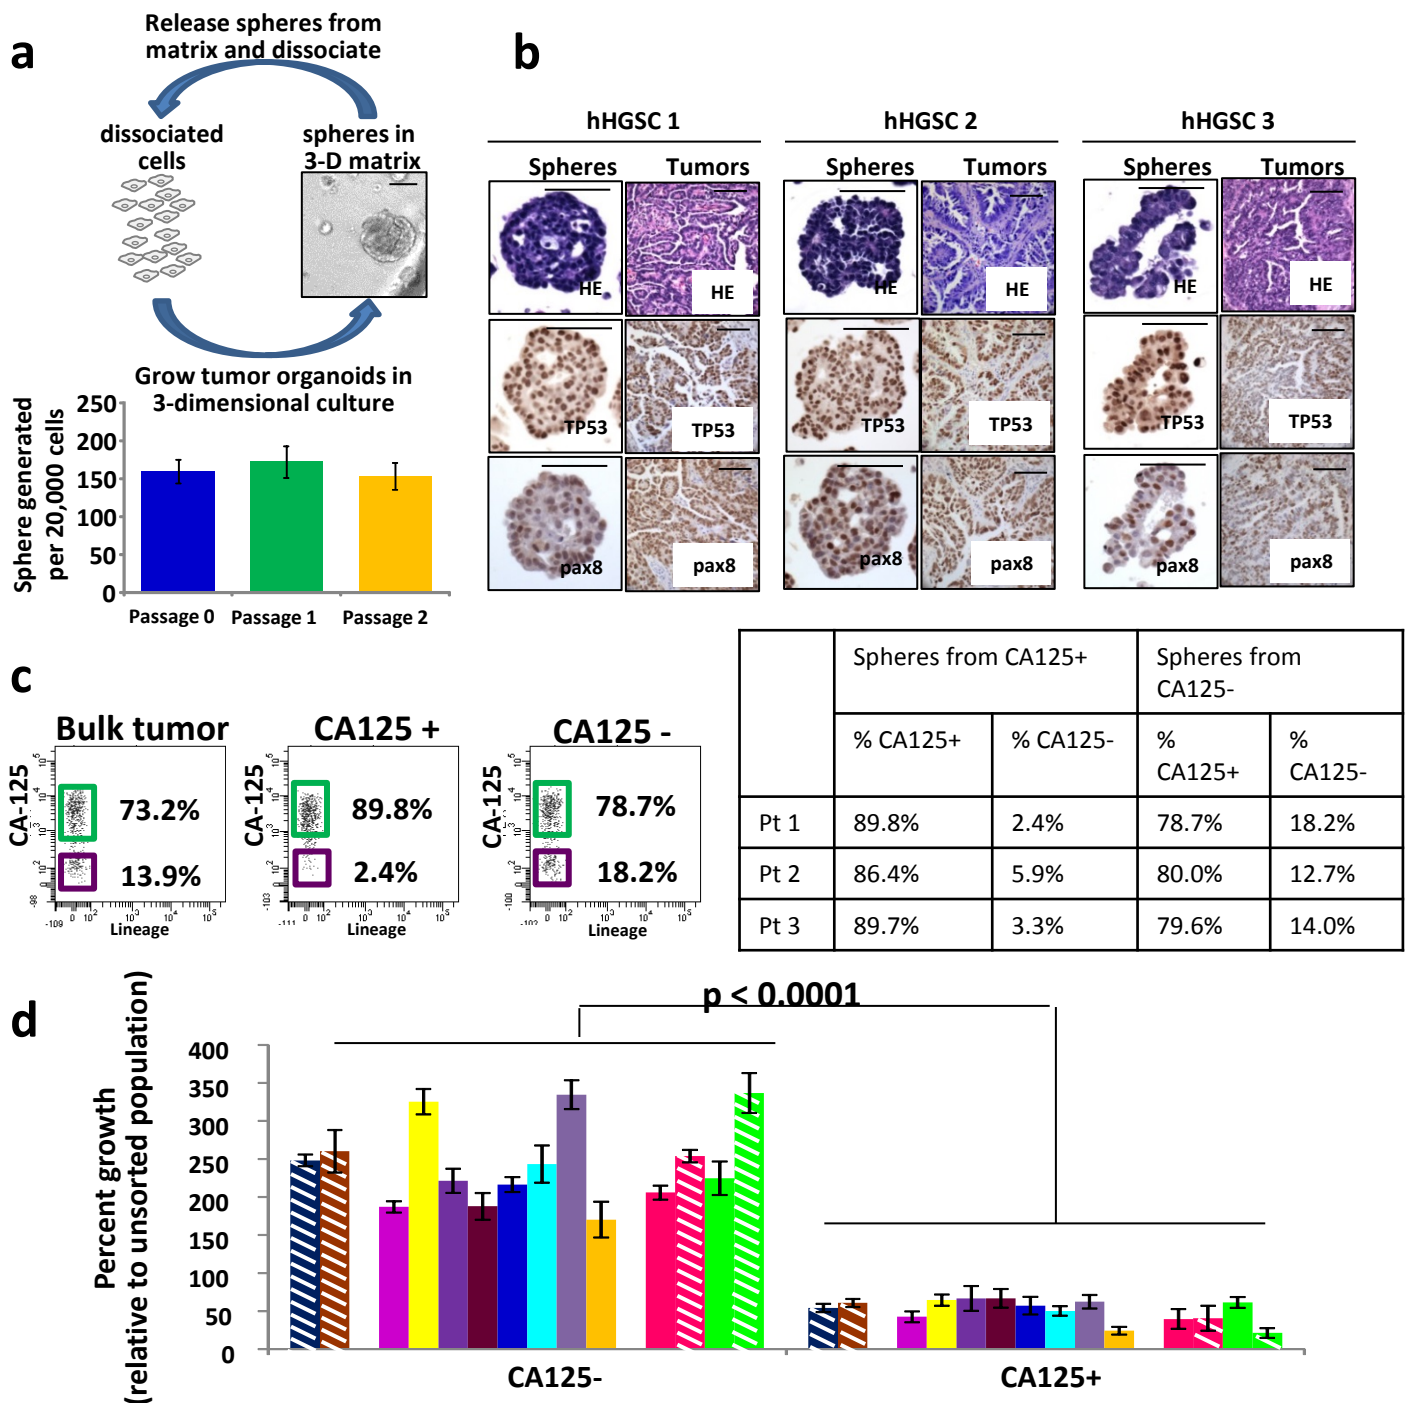

**Supplementary Figure 5. CA125 negative tumor cells isolated from primary human high-grade serous cancers differentiate and form self-renewing tumor organoids in vitro.** (a) HGSC single cells plated in a 3-dimensional matrix gave rise to organoids which upon release and dissociation into single cells had sustained self-renewal capacity. (b) Organoids resembled the parent tumor based on histology and marker expression profile (n=3). Scale bars equal 100  $\mu$ m. (c) FACS analysis of organoids generated from primary HGSC CA125 subpopulations demonstrated presence of CA125 positive and negative progeny in organoids arising from the CA125 negative fraction. Conversely, the CA125 positive tumor fraction gave rise to predominantly CA125 positive cells (n=3). (d) Equal numbers of CA125 negative, CA125 positive and unfractionated tumor cells from primary human chemo-naive HGSCs were plated in the 3D assay. CA125 negative serous tumor cells demonstrated significantly higher organoid forming capacity compared to CA125 positive counterparts ( $p < 0.0001$ , paired two-sided *t*-test). Hatched bars indicate ascites samples (n=2) while intact bars represent samples from solid tumors (n=8). Matched ascites and solid tumors were available for 2 specimens (red and green bars). Organoid growth capacity was normalized to activity in bulk tumor cells for each sample. Results are mean  $\pm$  SD, n=3 replicates per sample.

## Supplementary Fig. 6

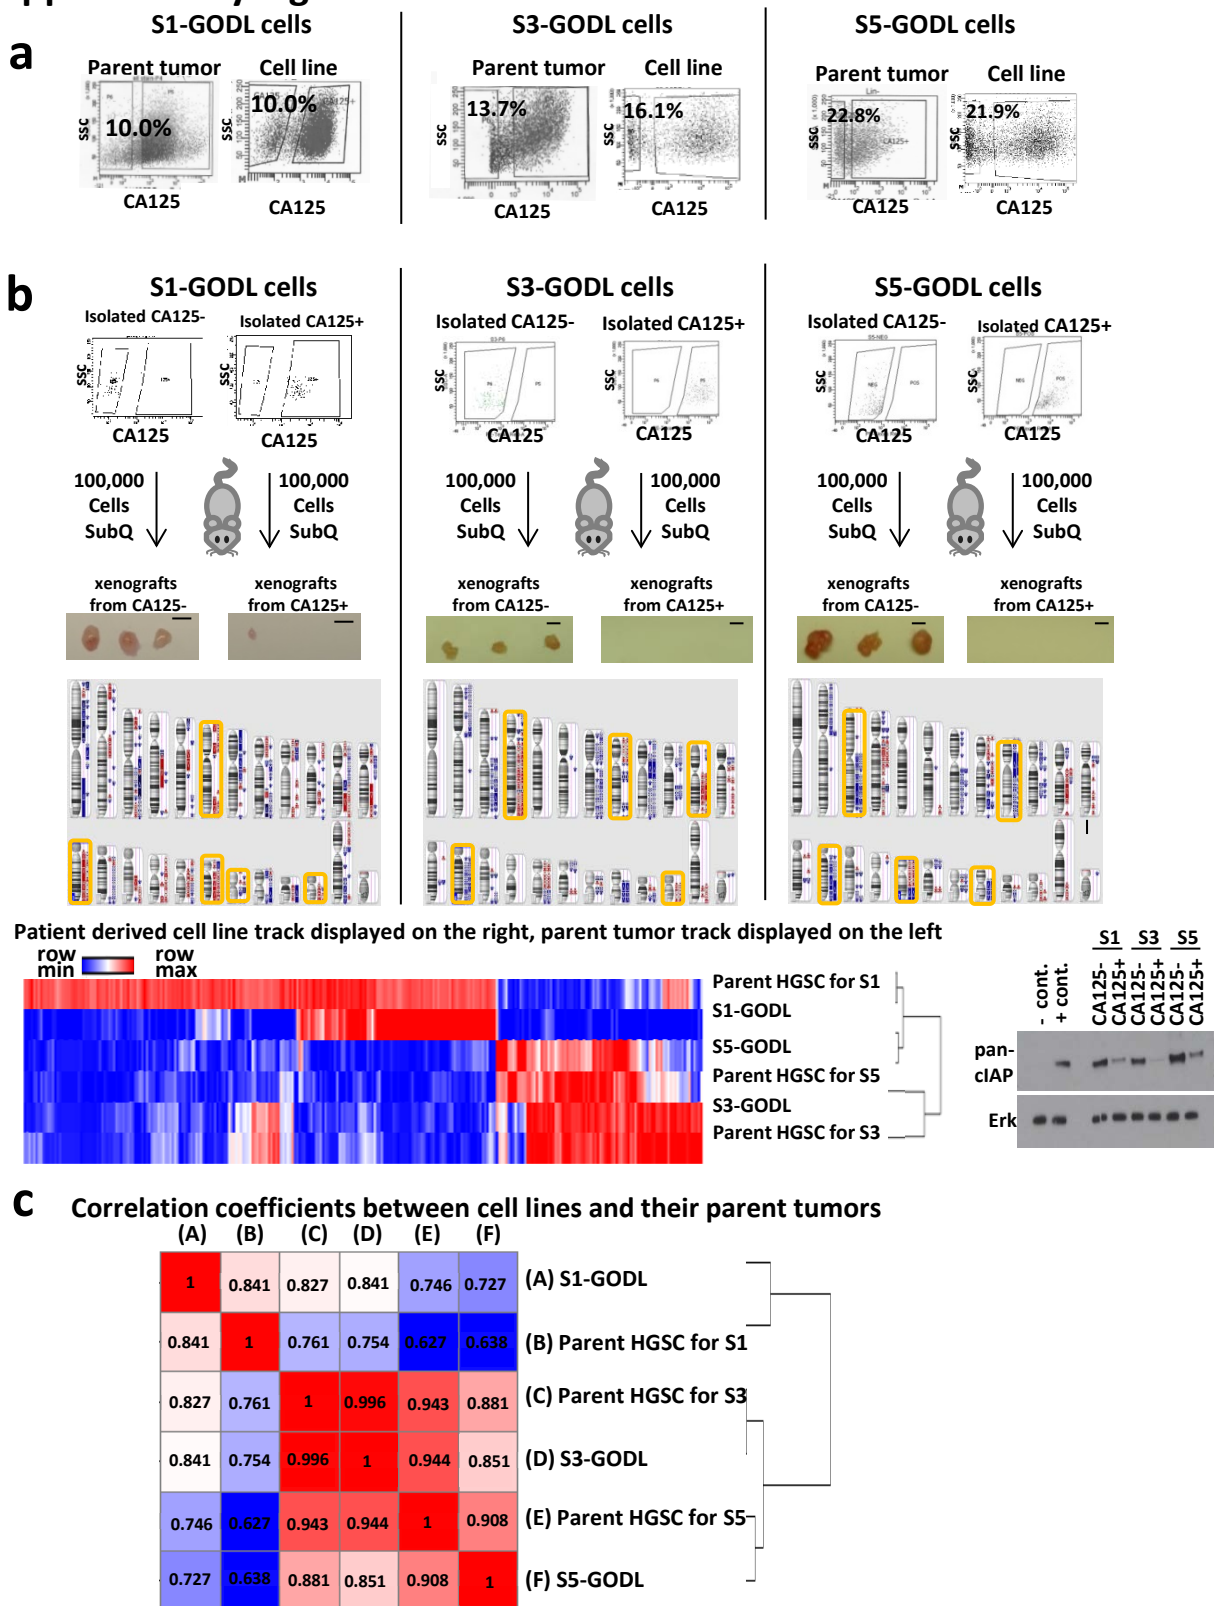

### Supplementary Figure 6. Characterization of the low passage, patient derived HGSC cell lines S1-, S3- and S5-GODL.

(a) Based on FACS analysis, subsets of low-passage patient derived HGSC cell lines (S1-, S3- and S5-GODL) are CA125 negative in comparable proportion to the parent tumor. (b) Only the CA125 negative subpopulation of these cell lines efficiently gave rise to tumors (n=3 replicates). Genomic copy number variation analysis revealed conserved amplifications and deletions between the cell lines and parent tumors, while clustering analysis confirms similarity between transcript expression patterns. Elevated expression of cIAP proteins was detected in the CA125 negative subpopulation of all lines by western blot. (c) Calculation of the correlation between cell lines and parent tumors indicated that each cell line closely resembled their parent HGSC ( $r^2= 0.841$  for S1-GODL, 0.996 for S3 GODL and 0.908 for S5-GODL).  $R^2$  calculated using R function of hclust().

## Supplementary Fig. 7

### Supplementary Figure 7. HGSC cell death induced by Birinapant and carboplatin co-therapy is directly mediated by degradation of cIAP.

(a) FACS analysis demonstrated that in S1-GODL, S3-GODL and S5-GODL cell lines, all cells including the CA125 negative population, could be eliminated with birinapant and carboplatin co-treatment in vitro. CA125 negative tumor cells were resistant to Carboplatin alone. Birinapant as a single agent caused only partial cell death. Averaging this data as a plot of cell survival for S1,3&5-GODL cell lines demonstrated that only combined birinapant and carboplatin co-treatment resulted in complete tumor cell kill (n=3 replicates per sample). Birinapant mediated degradation of cIAP and apoptotic induced PARP cleavage is confirmed by western blot in S1,3&5-GODL treated cells.

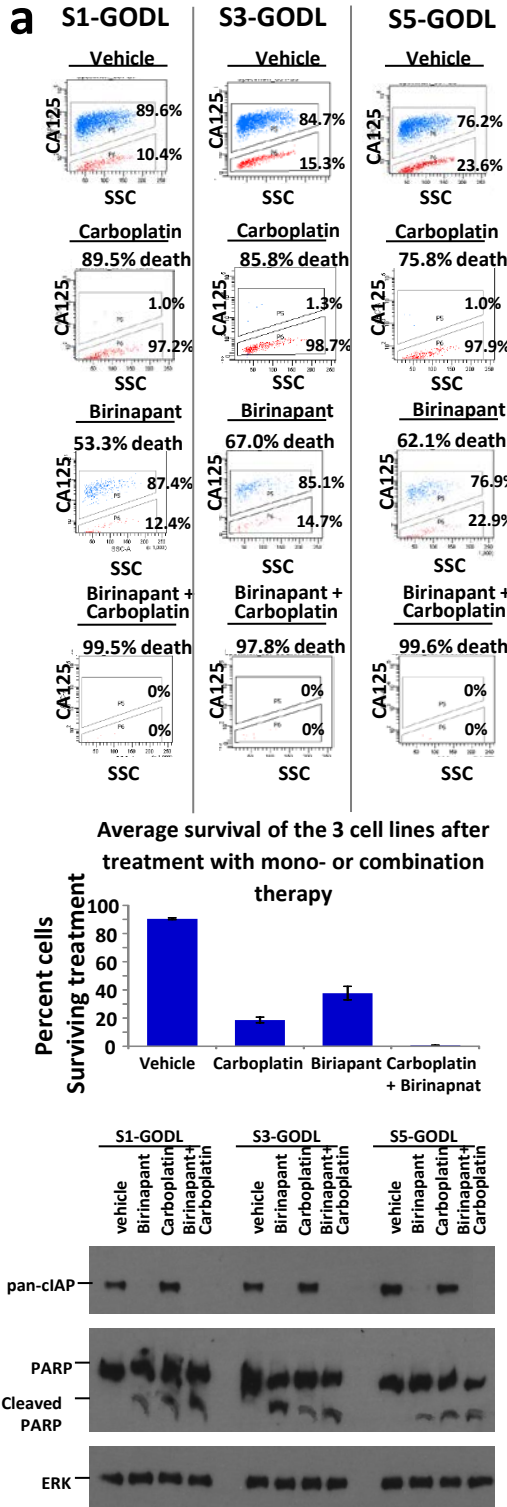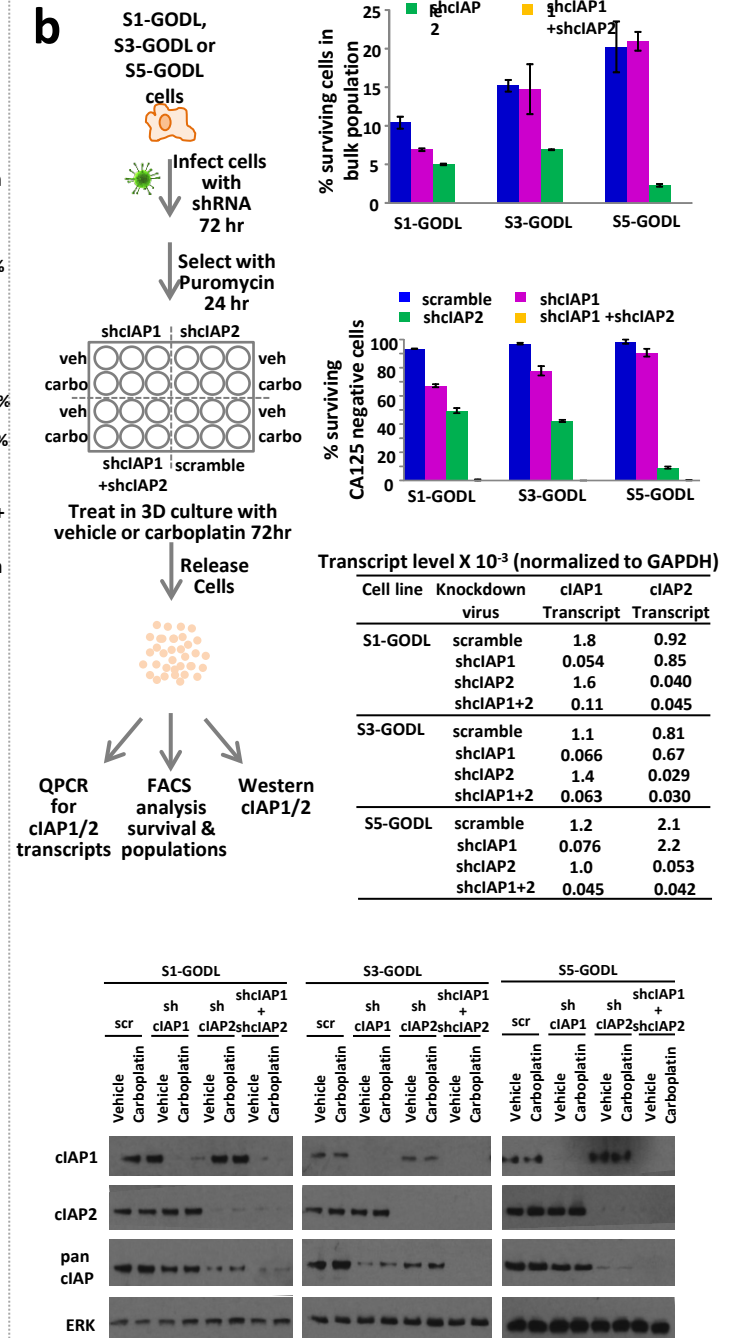

(b) To achieve selective knockdown of cIAP proteins, S1-GODL, S3-GODL, or S5-GODL cells were infected with lentivirus expressing short hairpin RNAs targeting cIAP1, cIAP2, cIAP1&cIAP2 or a scrambled control. After elimination of uninfected cells by puromycin treatment, cells were treated in triplicates with either vehicle or carboplatin. Cell survival (determined by propidium iodide and annexin V negativity) and CA125 expression was quantified by FACS analysis. Graphs of cell survival for the bulk cells and the CA125 negative subpopulation is shown for each cell line. Results are mean  $\pm$  SD, n=3. Knockdown of cIAP1 and cIAP2 together sensitized the CA125 negative cells to carboplatin treatment, resulting in complete cell death. Knockdown of neither cIAP alone could cause complete elimination of CA125 negative cells in response to carboplatin. Specific knockdown of cIAP proteins was verified by QPCR for cIAP1 and cIAP2 transcripts and western blot. Collectively, these results show sensitization of the CA125 negative HGSC cells is likely a direct result of cIAP degradation.

# Supplementary Fig. 8

**Supplementary Figure 8. Decreased tumor burden was observed in patient derived cell lines co-treated with birinapant and carboplatin.** (a) Experimental schema for subcutaneous xenograft model.

Mice in each cohort harbored 4 individual tumors to enable comparison of therapy effects between experimental and control cells. Cell lines used in each cohort and their drug sensitivities are indicated. (b) Based on histology and expression of Pax8, combination therapy eliminated tumor cells in majority of subcutaneous xenografts (9 of 13). Tumor foci in carboplatin treated xenografts were predominantly CA125 negative. Scale bars equal 50  $\mu\text{m}$ . (c) Histologic examination of xenografts demonstrated the presence of tumor foci in all xenografts treated with birinapant monotherapy. Scale bars equal 50  $\mu\text{m}$ .

(d) While obvious tumor was detected in all carboplatin treated xenografts, disease was detected in only 5 of 11 subcutaneous xenografts in the co-therapy arm one month after the cessation of therapy, and these foci were small compared to carboplatin treated tumors. Resurgence of CA125 positive cells was observed in carboplatin treated grafts after therapy was stopped. Scale bars equal 50  $\mu\text{m}$ . (e) Serial measurement of tumor volume demonstrates that in contrast to other treatment groups, xenografts treated with birinapant and carboplatin co-therapy do not increase in size following the cessation of treatment. Results are mean  $\pm$  SEM, n=4 per group. (f) Full xenograft images are shown to demonstrate that when disease foci were detected in birinapant and carboplatin treated grafts released from therapy; these foci were very small compared to tumors in the carboplatin treated arm. Scale bars equal 500  $\mu\text{m}$ .

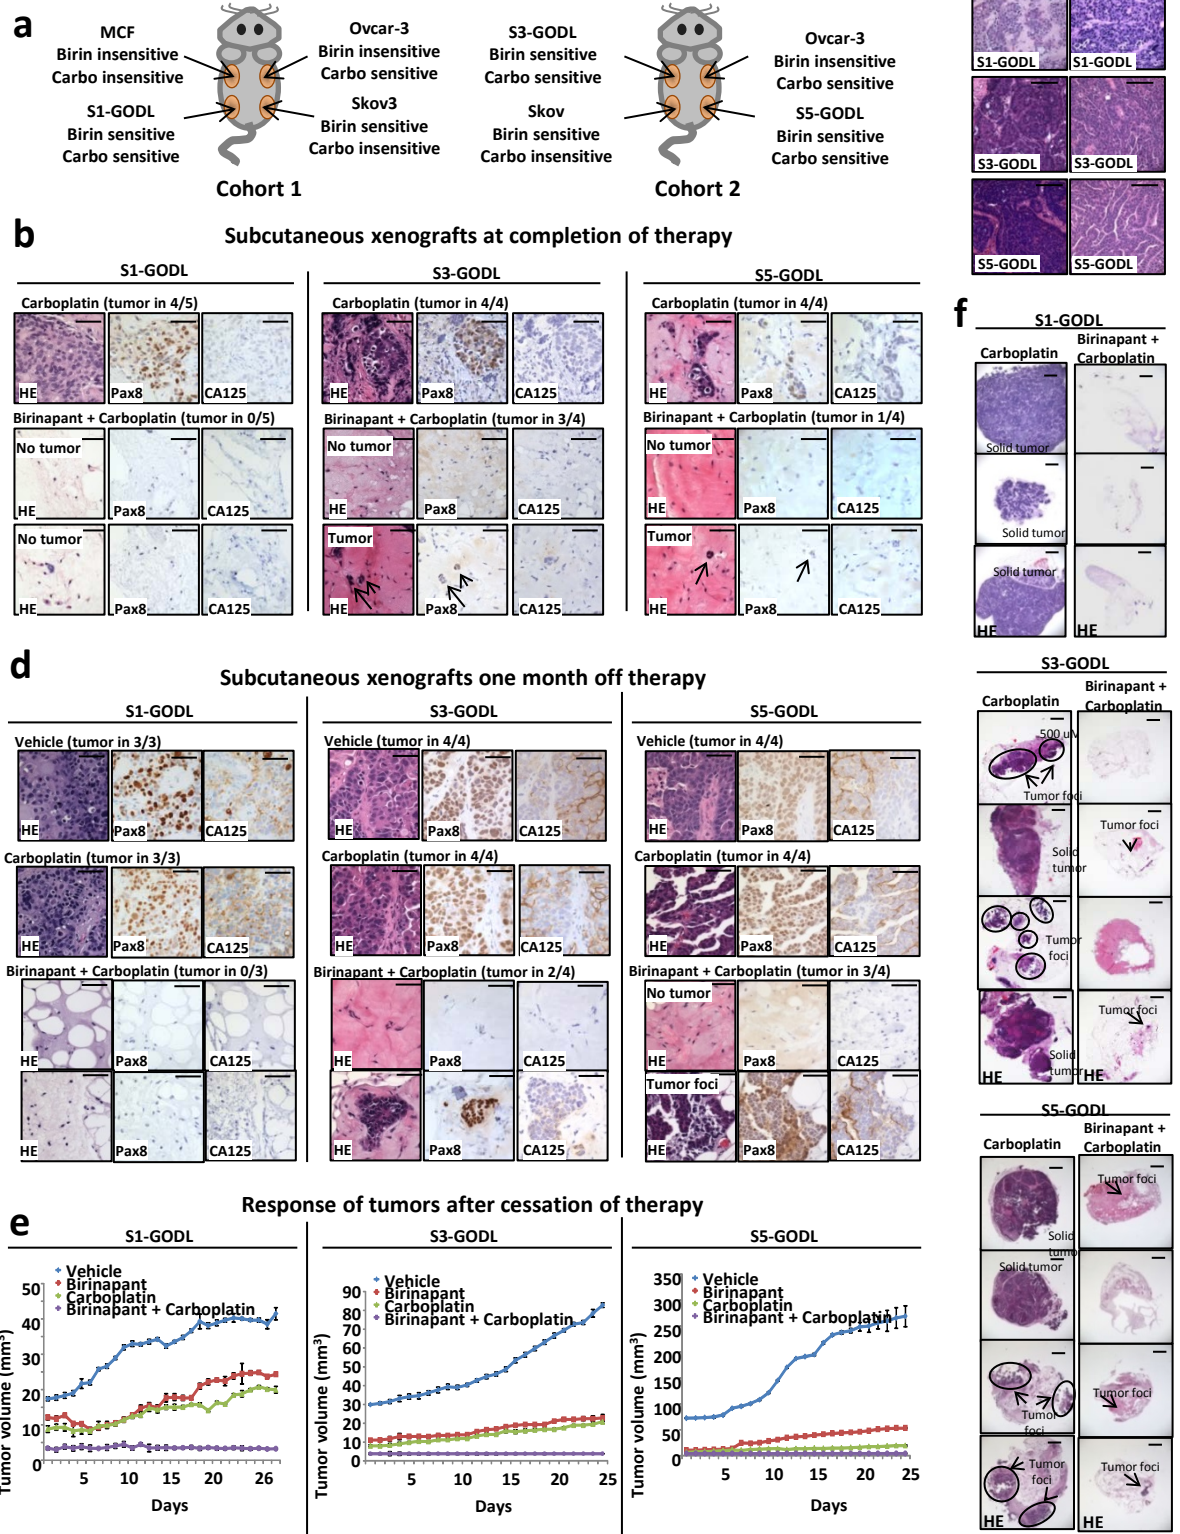



## Supplementary Fig. 9

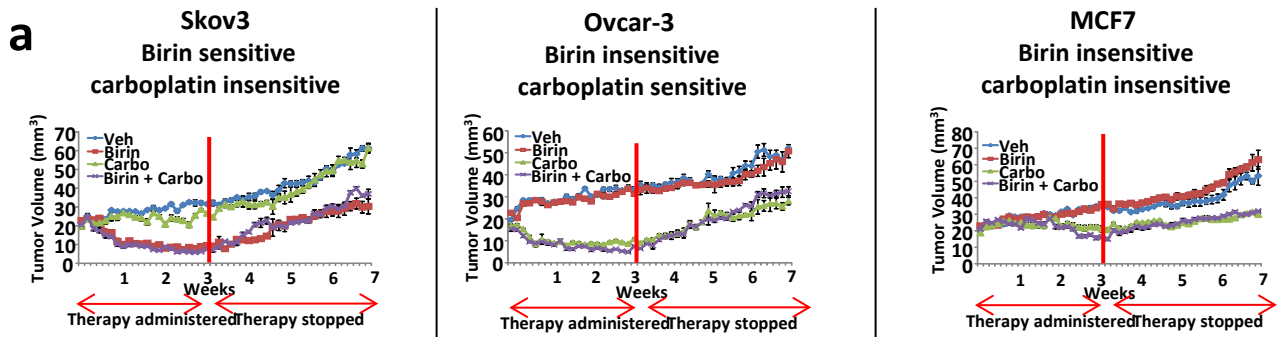

**b**

### Subcutaneous xenografts at completion of therapy

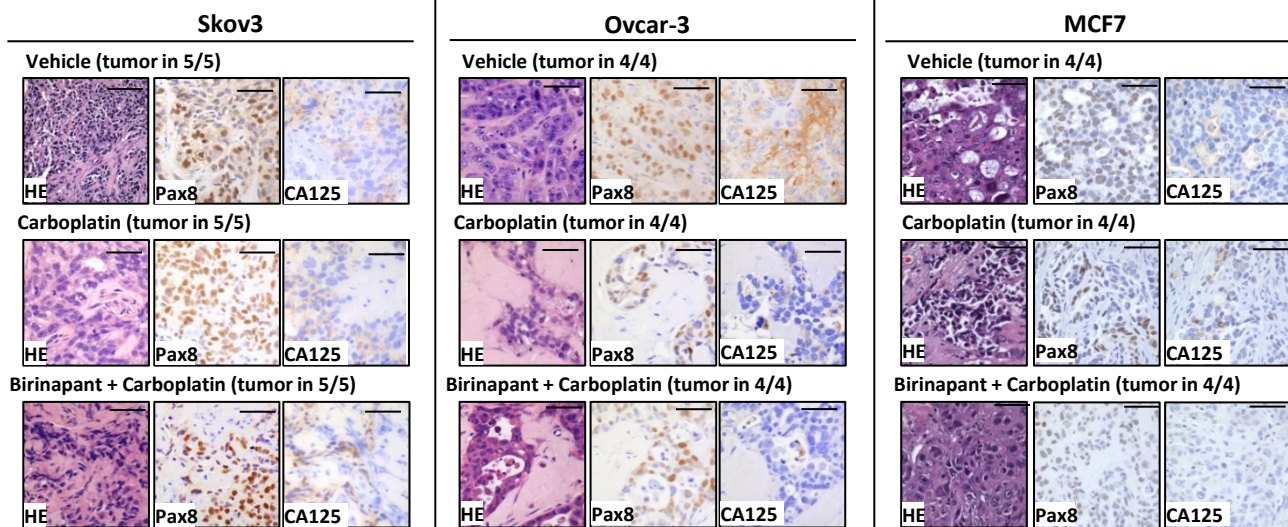

**c**

### Subcutaneous xenografts 1 month off therapy

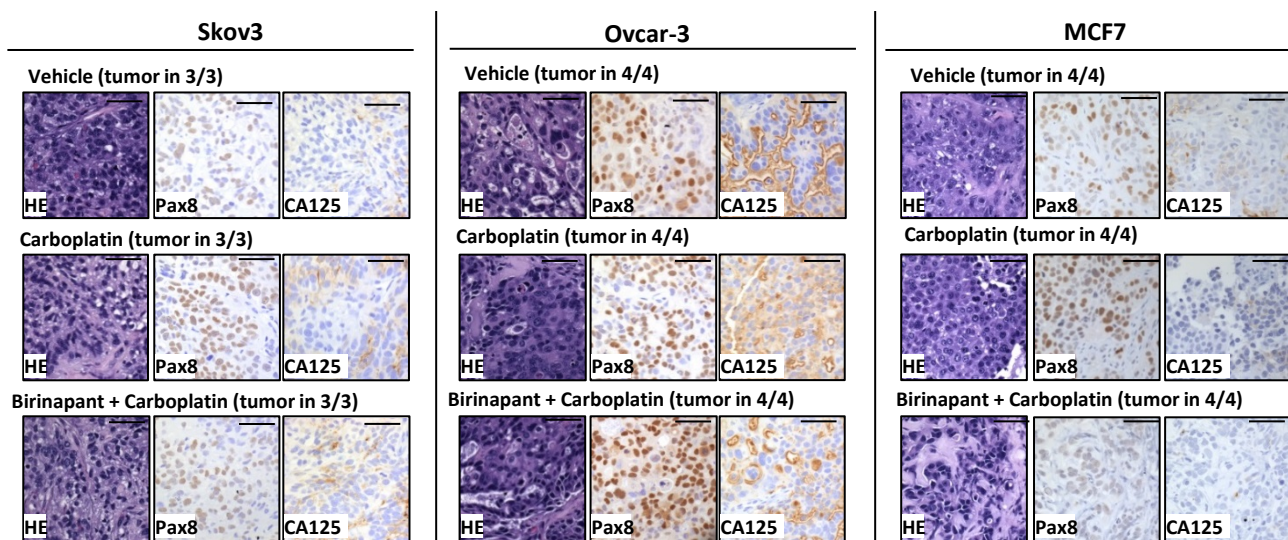

**Supplementary Figure 9. Response of control cell lines to in vivo therapy correlated with their known drug sensitivities (a)** Serial measurement of tumor volumes demonstrated that Skov3 cells responded only to birinapant therapy, Ovcar-3 cells responded to carboplatin, and MCF7 cells exhibited minimal response to either drug. Results are mean  $\pm$  SEM, n=4 **(b)** Based on histology and immunohistochemistry, tumor was detected in all subcutaneous xenografts at the completion of therapy. Scale bars equal 50  $\mu$ m. **(c)** Tumor was also detected in all control grafts one month after cessation of therapy. Scale bars equal 50  $\mu$ m.

# Supplementary Fig. 10

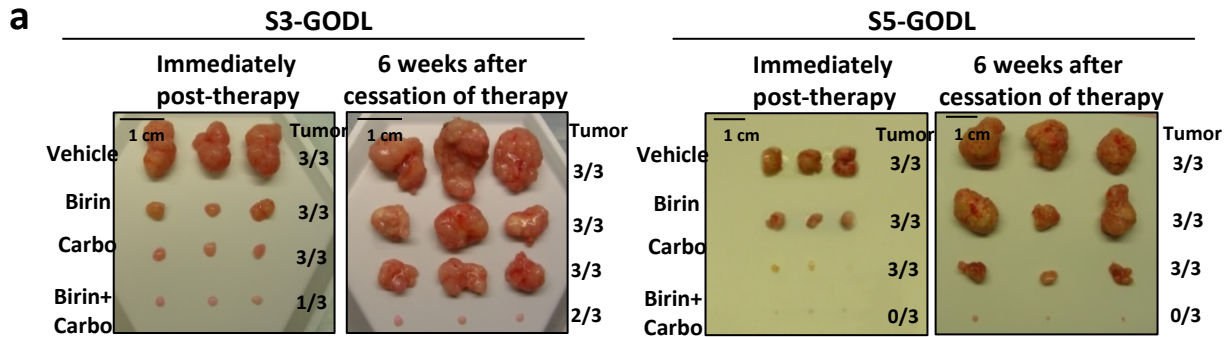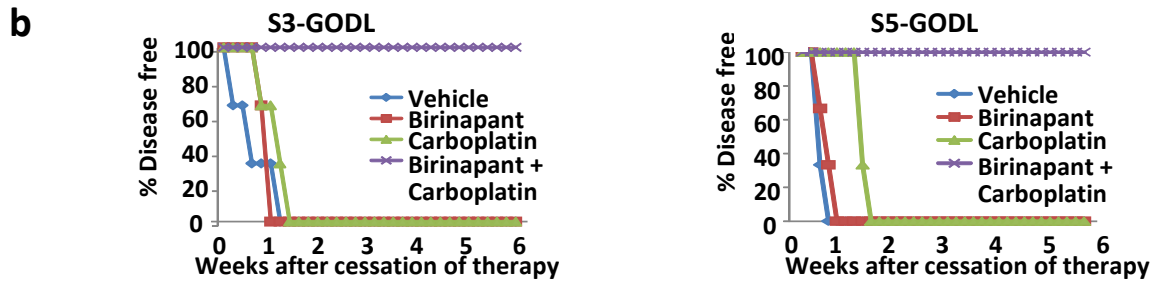

**c Vehicle treated (S3-GODL)**

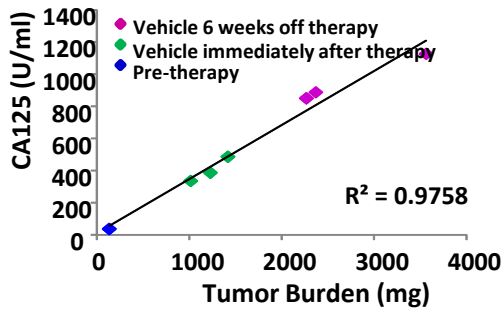

**Vehicle treated (S5-GODL)**

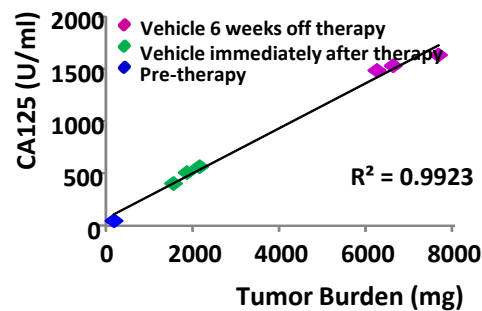

**Carboplatin treated (S3-GODL)**

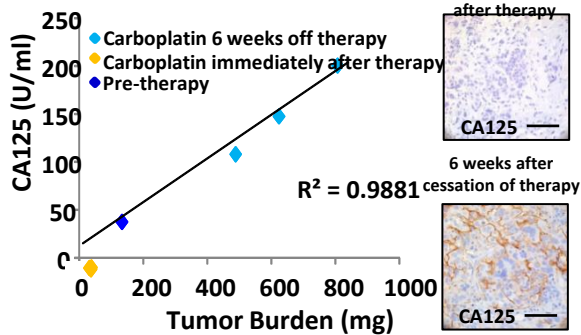

**Carboplatin treated (S5-GODL)**

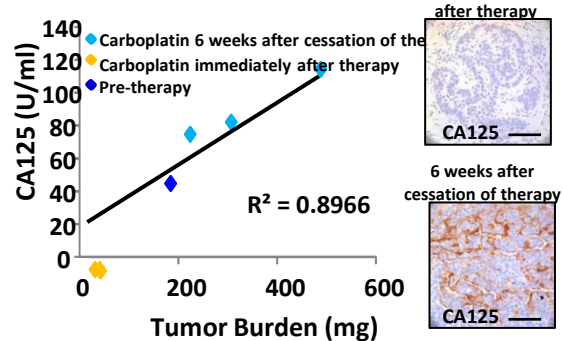

**Supplementary Figure 10. Serum CA125 correlated with tumor burden only when majority of tumor cells expressed CA125 on their cell surface.** (a) Gross tumors from mice bearing only S3-GODL or S5-GODL xenografts and treated with vehicle, carboplatin, birinapant or the combination therapy are shown. Residual xenografts in the co-therapy arm were significantly smaller compared to monotherapy treated tumors immediately after treatment and 6 weeks following cessation of treatment ( $p < 0.01$  by one-way ANOVA,  $n = 3$  per group). Scale bars equal 1 cm (b) In both cohorts, mice treated with birinapant and carboplatin co-therapy showed no progression of disease after cessation of therapy vastly different from results seen in mono-therapy arms ( $n = 3$  per group). (c) Human serum CA125 levels detected in vehicle treated mice ( $n = 3$  per group) correlated with tumor burden. In carboplatin treated mice ( $n = 3$  per group), human CA125 was detected only after mice had been released from therapy and their tumors expressed CA125. This biomarker was undetectable immediately after therapy despite detection of CA125 negative tumor cells in the carboplatin treated xenografts. Scale bars equal 50  $\mu\text{m}$ .  $R^2$  calculated by linear regression.

## Supplementary Fig. 11

### a Blood chemistry and CBC values for mice treated with in vivo therapies

| Test          | Vehicle (n=9) | Birinapant (n=9) | Carboplatin (n=9) | Birinapant + Carboplatin (n=9) | p      |
|---------------|---------------|------------------|-------------------|--------------------------------|--------|
| ALP (U/L)     | 82.5 ± 2.4    | 69.5 ± 8.9       | 61.9 ± 15         | 79.8 ± 6.0                     | 0.29   |
| ALT (U/L)     | 53 ± 15       | 62.9 ± 14.7      | 73.3 ± 10.9       | 108.7 ± 28.2                   | 0.31   |
| AST (U/L)     | 121 ± 27      | 143 ± 29         | 190 ± 27          | 294 ± 85                       | 0.32   |
| DBILI (mg/dL) | 0.4 ± 0.1     | 0.3 ± 0          | 0.7 ± 0.2         | 0.6 ± 0.1                      | 0.66   |
| BUN (mg/dL)   | 29 ± 2        | 27 ± 4           | 26 ± 2            | 28 ± 3                         | 0.77   |
| CREAT (mg/dL) | 0.3 ± 0       | 0.2 ± 0          | 0.2 ± 0           | 0.2 ± 0                        | 0.86   |
| LDH (U/L)     | 574 ± 66      | 808 ± 60         | 1198 ± 323        | 988 ± 213                      | 0.61   |
| ALB (g/dL)    | 3.6 ± 0.1     | 3.1 ± 0.2        | 3.1 ± 0.1         | 3.4 ± 3.6                      | 0.06   |
| TP (g/DL)     | 5.9 ± 0.1     | 5.2 ± 0.2        | 5.4 ± 0.1         | 5.0 ± 0.6                      | 0.57   |
| GLU (mg/dL)   | 243 ± 18      | 180 ± 21         | 205 ± 9           | 225 ± 15                       | 0.34   |
| Na (mmol/L)   | 153 ± 5       | 150 ± 4          | 146 ± 4           | 158 ± 1                        | 0.06   |
| K (mmol/L)    | 23 ± 12       | 10 ± 0.2         | 11 ± 0.4          | 11 ± 0.6                       | 0.93   |
| Cl (mmol/L)   | 115 ± 16      | 132 ± 5          | 113 ± 48          | 116 ± 64                       | 0.41   |
| RBC (M/μL)    | 9.1 ± 0.3     | 9.1 ± 0.1        | 8.2 ± 0.4         | 7.9 ± 0.2                      | 0.62   |
| HB (g/dL)     | 12.8 ± 0.4    | 12.3 ± 0.2       | 11.5 ± 0.6        | 11.0 ± 0.3                     | 0.47   |
| HCT (%)       | 46.6 ± 1.4    | 45.1 ± 0.8       | 43.8 ± 2.5        | 40.5 ± 1.3                     | 0.25   |
| PLT (K/μL)    | 1234 ± 46     | 1192 ± 42        | 639 ± 103         | 521 ± 41                       | 0.30   |
| NE (K/μL)     | 2.2 ± 0.3     | 4.6 ± 1.1        | 1.2 ± 0.3         | 3.3 ± 0.6                      | 0.006* |
| Ly (K/μL)     | 0.5 ± 0.1     | 1.6 ± 0.5        | 0.8 ± 0.3         | 1.4 ± 0.2                      | 0.10   |
| MO (K/μL)     | 0.10 ± 0.01   | 0.26 ± 0.05      | 0.21 ± 0.03       | 0.48 ± 0.13                    | 0.07   |
| EO (K/μL)     | 0.05 ± 0.01   | 0.22 ± 0.05      | 0.12 ± 0.03       | 0.35 ± 0.11                    | 0.07   |
| BA (K/μL)     | 0.02 ± 0.01   | 0.05 ± 0.01      | 0.05 ± 0.01       | 0.10 ± 0.03                    | 0.12   |

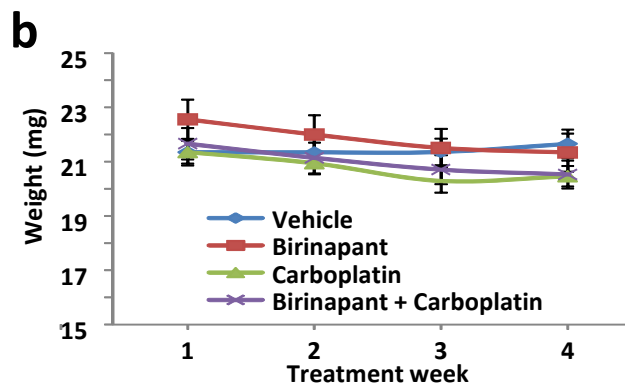

|                          | % Weight loss At completion of therapy | % Weight regained 1 month after therapy |
|--------------------------|----------------------------------------|-----------------------------------------|
| Vehicle                  | -1.42 ± 0.67                           | 4.15 ± 0.85                             |
| Birinapant               | 5.43 ± 0.61                            | 2.82 ± 0.51                             |
| Carboplatin              | 4.07 ± 0.79                            | 2.27 ± 0.23                             |
| Birinapant + Carboplatin | 5.27 ± 0.65                            | 4.14 ± 1.21                             |

**Supplementary Figure 11. Birinapant and carboplatin co-therapy is safe and well-tolerated.** (a) Blood chemistry and complete blood count analysis demonstrates that addition of birinapant to carboplatin therapy did not increase carboplatin induced neutropenia or thrombocytopenia. No additional effects on liver or renal function were observed when birinapant was added to carboplatin therapy Results are mean ± SEM (n=9, p value calculated by unpaired, two-sided t-test). (b) Weight loss with combined carboplatin and birinapant co-therapy was less than 10% of original body weight, was statistically similar to weight loss with carboplatin treatment alone, and was reversed with cessation of treatment. Results are mean ± SEM, n= 6 per group).

Supplementary Figure 12.

a

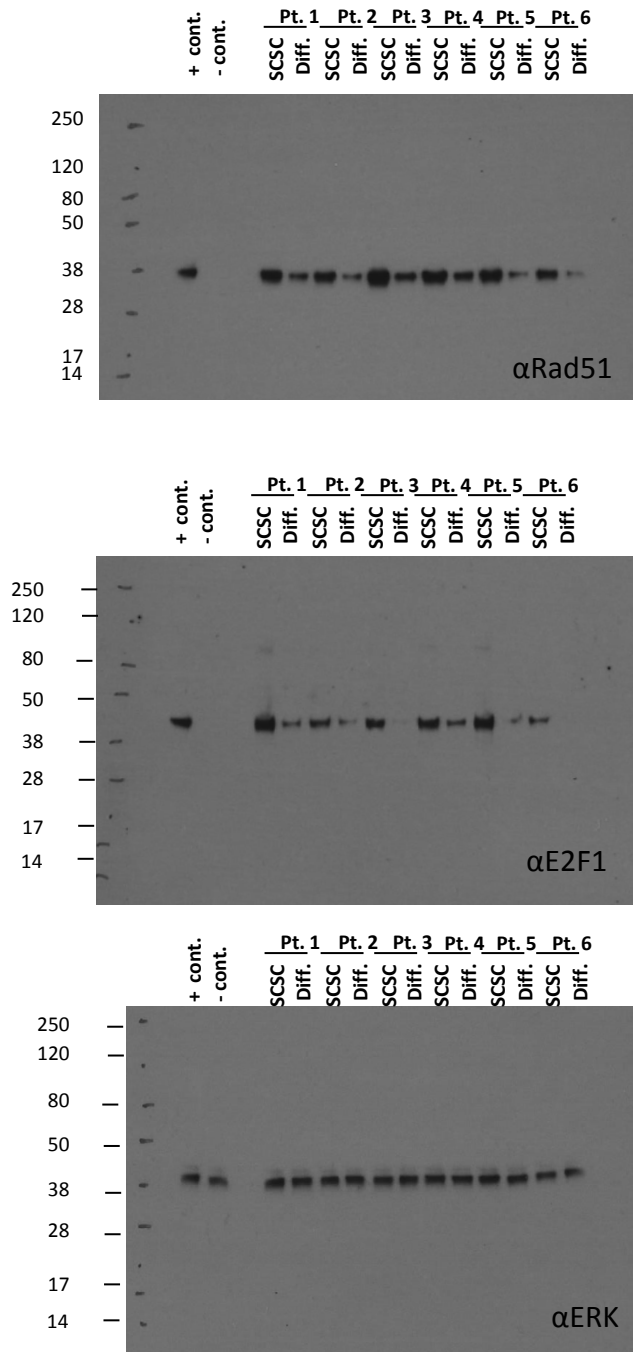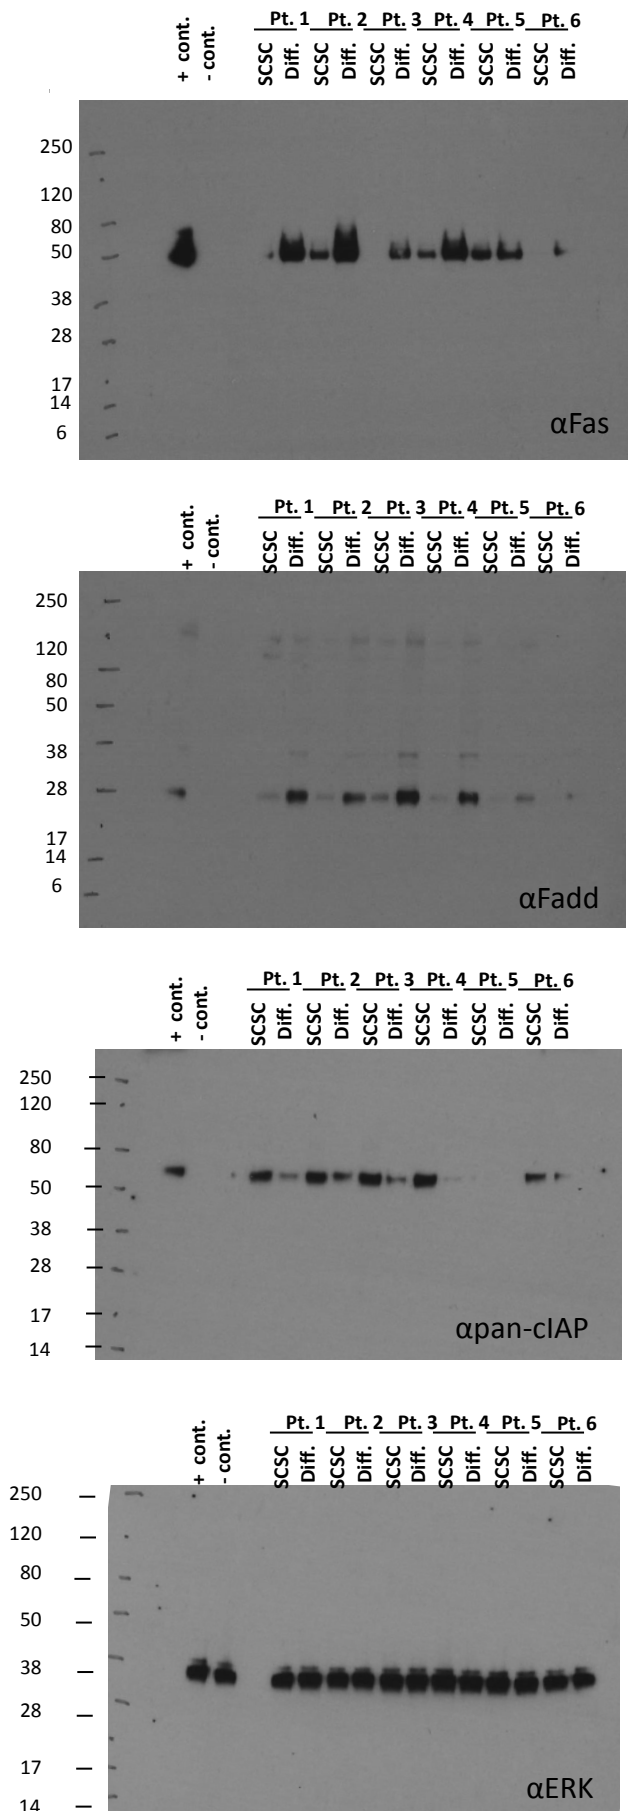

Supplementary Figure 12. (a) Full length images of western blots for Figure 3

Supplementary Figure 12 continued.

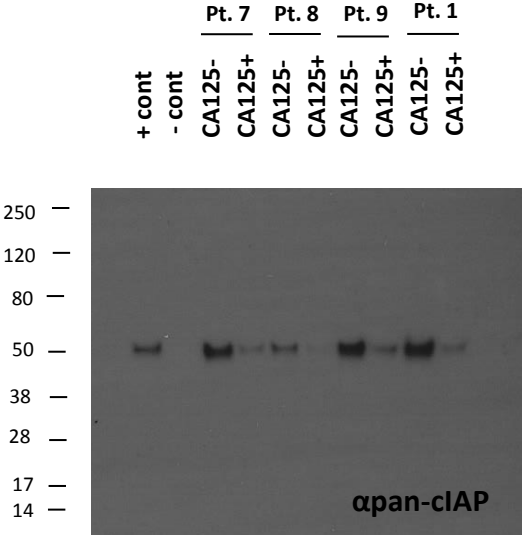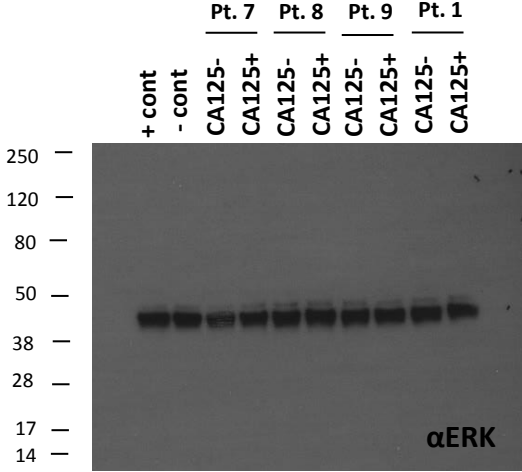

Supplementary Figure 12. (b) Full length images of western blots for Figure 4b

Supplementary Figure 12 continued.

5b HGSC 1

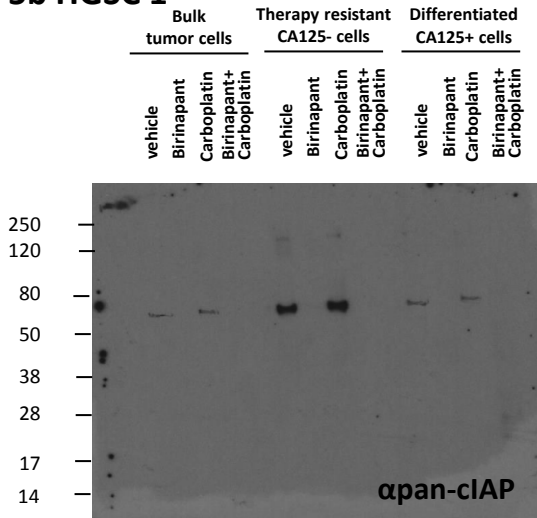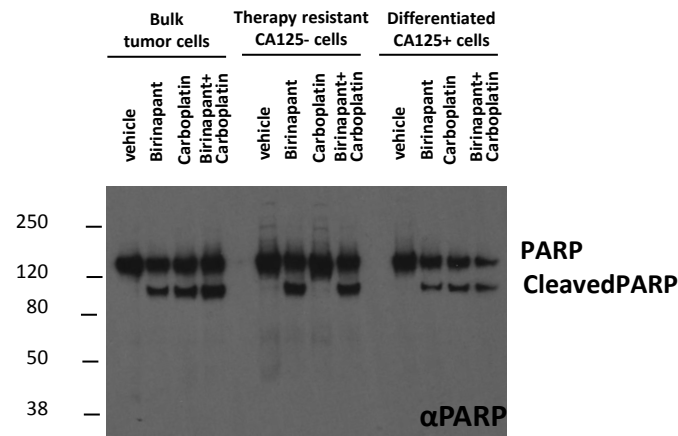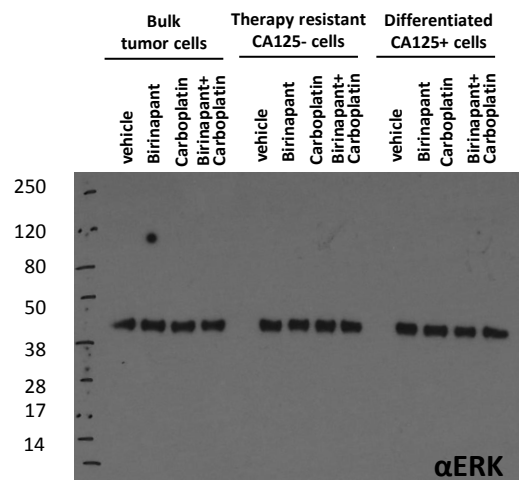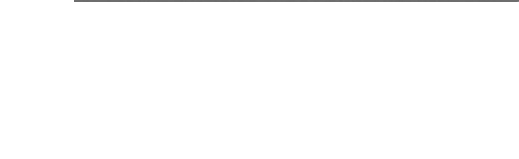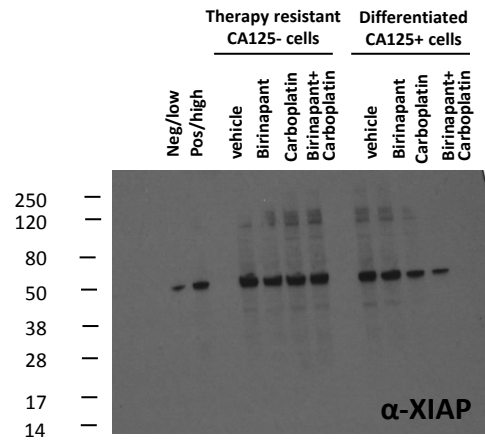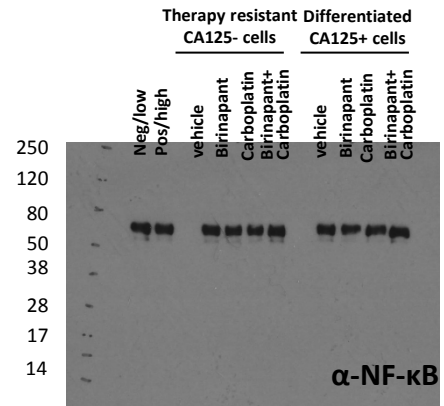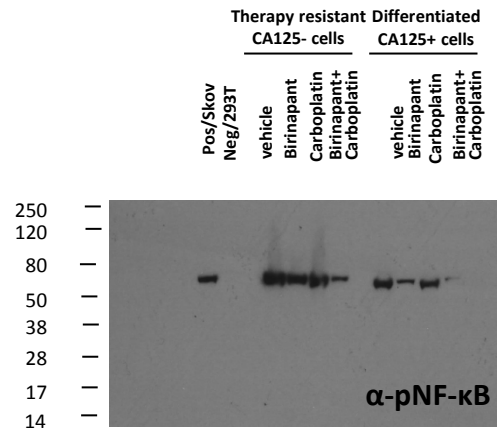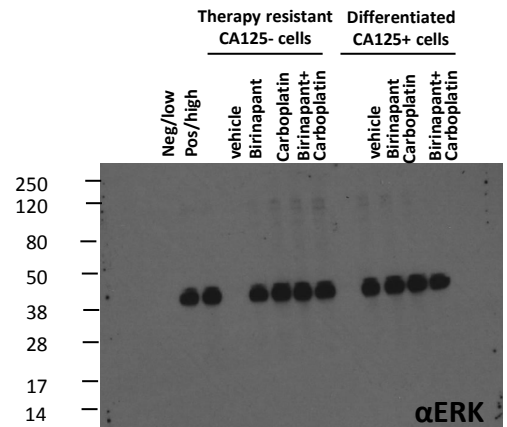

Supplementary Figure 12. Full length images of western blots for Figure 5b

Supplementary Figure 12 continued.

5b HGSC2

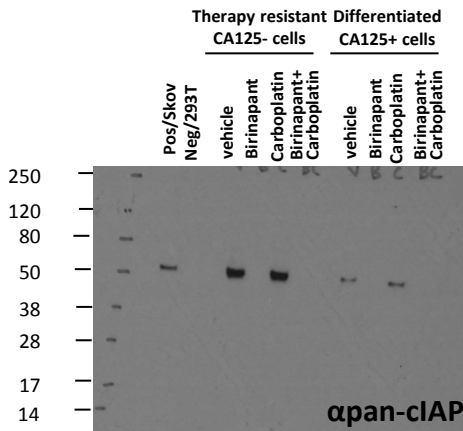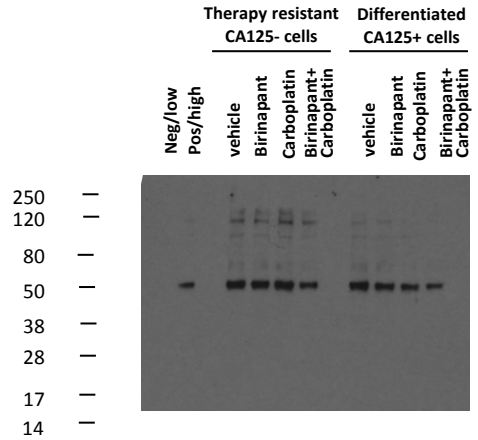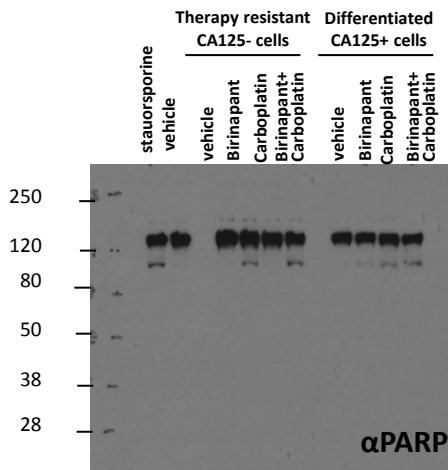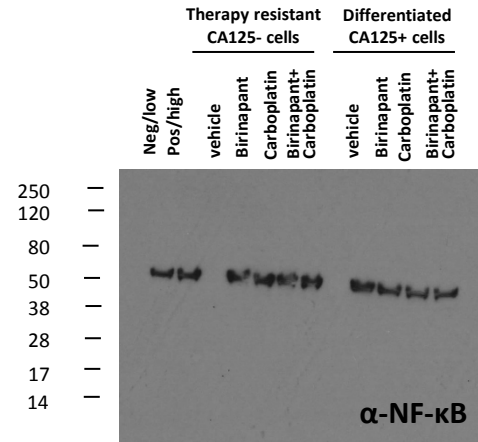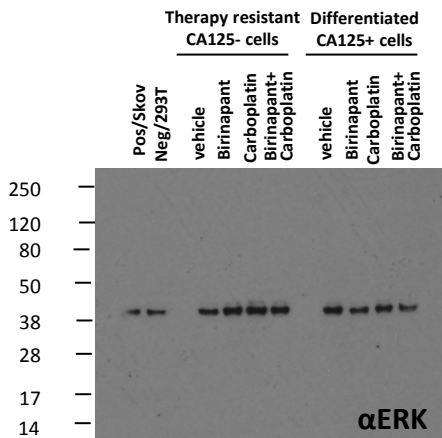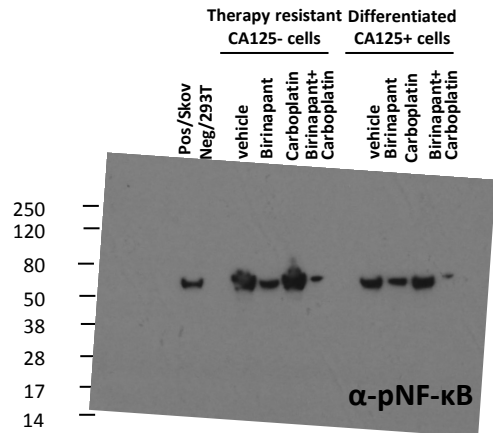

Supplementary Figure 12. Full length images of western blots for Figure 5b

Supplementary Figure 12 continued.

5b HGSC3

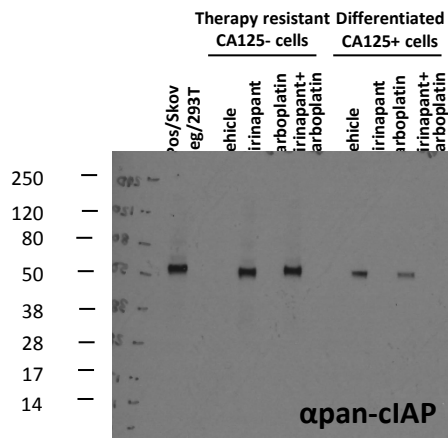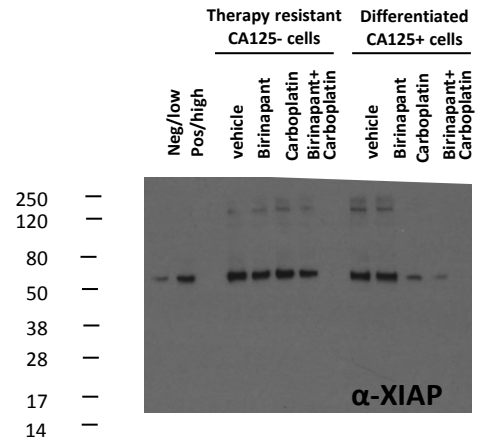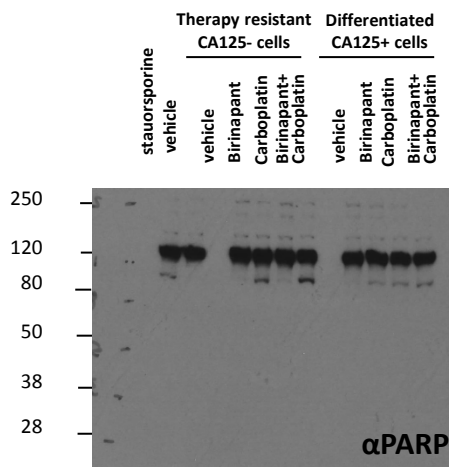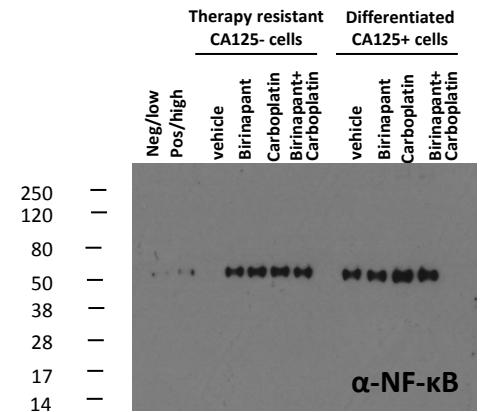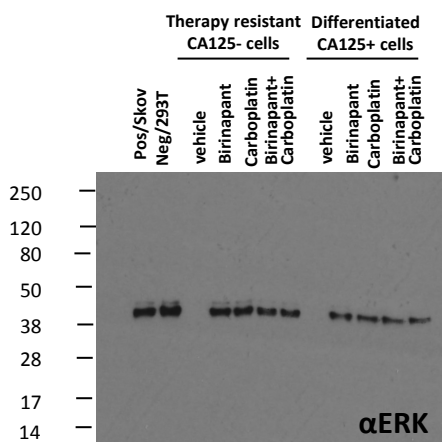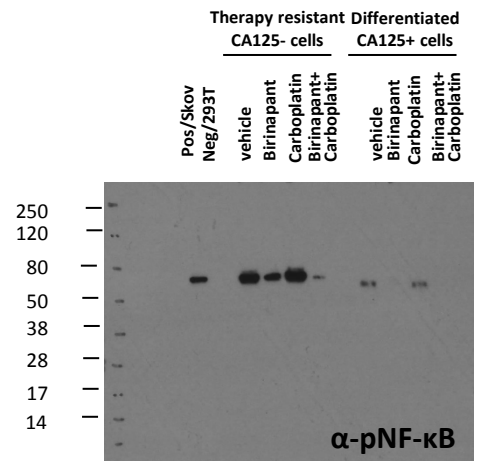

Supplementary Figure 12. Full length images of western blots for Figure 5b



Supplementary Figure 12 continued.

5c

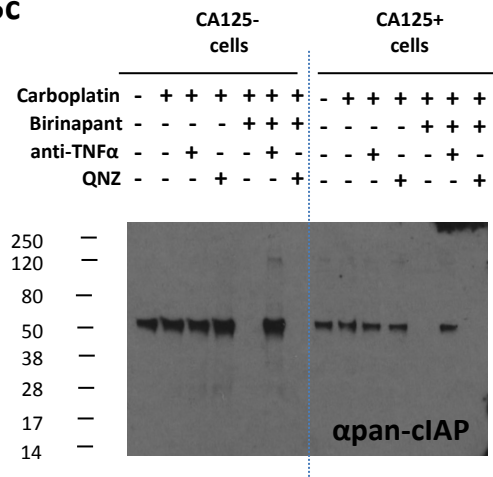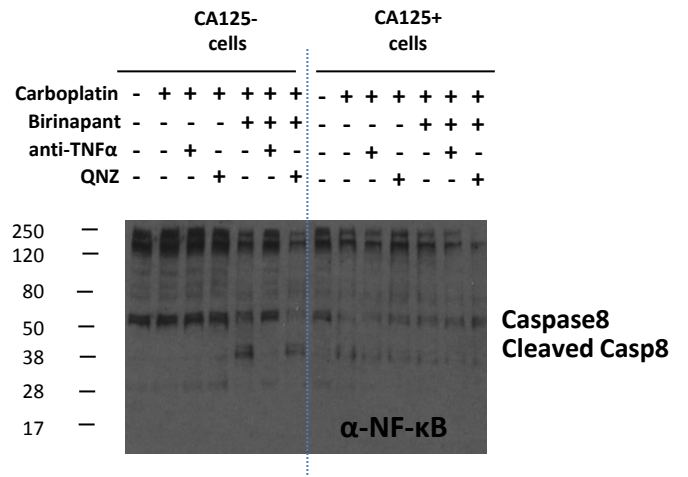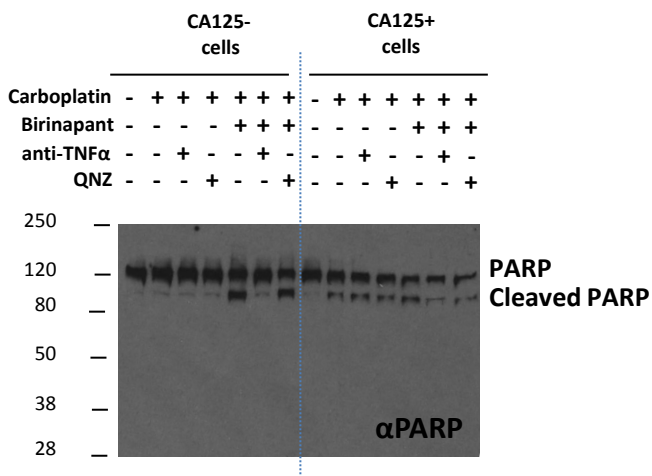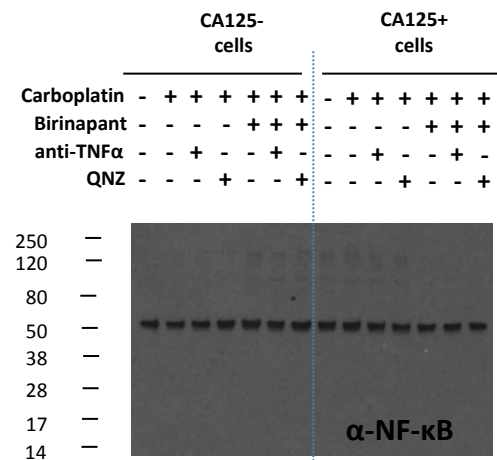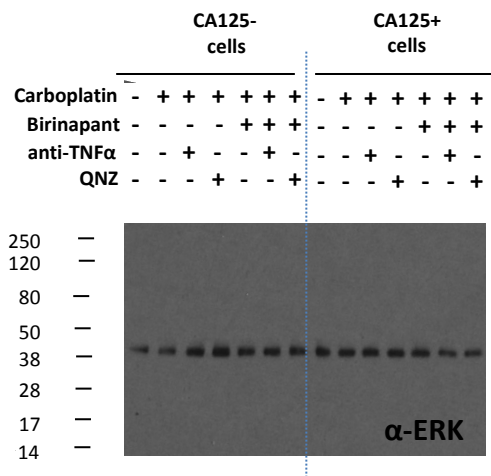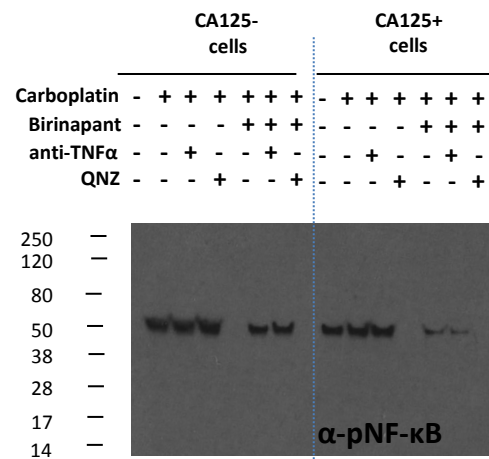

Supplementary Figure 12. Full length images of western blots for Figure 5c

Supplementary Figure 12 continued.

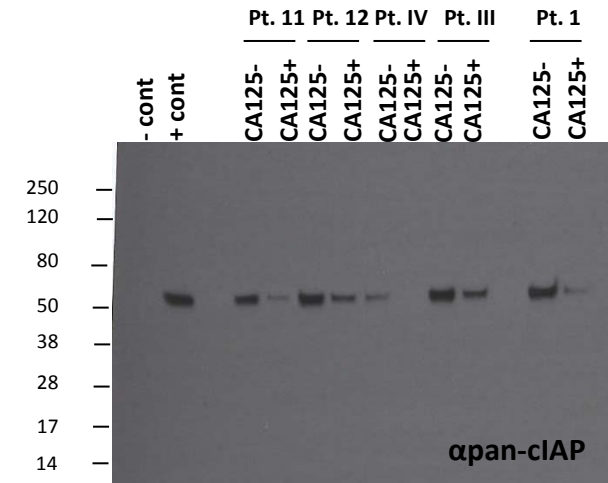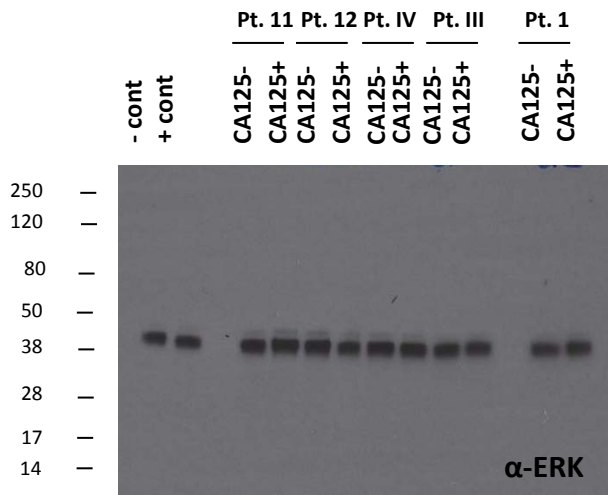

Supplementary Figure 12. Full length images of western blots for Figure 8b

**Supplementary Table 1. Specimen characteristics**

| <b>Fresh or Frozen</b>                | <b>Tumor format (solid or ascites)</b> | <b>Tumor Grade</b> | <b>Cytoreduction on initial surgery</b> | <b>BRCA status</b> |
|---------------------------------------|----------------------------------------|--------------------|-----------------------------------------|--------------------|
| <b>Chemo-naive specimens</b>          |                                        |                    |                                         |                    |
| Frozen                                | Ascites                                | high grade         | optimal                                 | Wild-type          |
| Frozen                                | Ascites                                | high grade         | sub-optimal                             | Wild-type          |
| Frozen                                | Solid                                  | high grade         | optimal                                 | BRCA2 mutated      |
| Frozen                                | Solid                                  | high grade         | sub-optimal                             | Wild-type          |
| Frozen                                | Solid                                  | high grade         | optimal                                 | Wild-type          |
| Frozen                                | Solid                                  | high grade         | sub-optimal                             | BRCA2 mutated      |
| Frozen                                | Solid                                  | high grade         | optimal                                 | Wild-type          |
| Fresh                                 | Solid                                  | high grade         | optimal                                 | Wild-type          |
| Fresh                                 | Solid                                  | high grade         | optimal                                 | Wild-type          |
| Fresh                                 | Solid                                  | high grade         | sub-optimal                             | Wild-type          |
| Fresh                                 | Ascites- matched solid                 | high grade         | optimal                                 | Wild-type          |
| Fresh                                 | Ascites- matched solid                 | high grade         | sub-optimal                             | Wild-type          |
| Frozen                                | Solid                                  | high grade         | optimal                                 | BRCA1 mutated      |
| Frozen                                | Solid                                  | high grade         | optimal                                 | Wild-type          |
| Frozen                                | Solid                                  | high grade         | optimal                                 | Wild-type          |
| Frozen                                | Solid                                  | high grade         | optimal                                 | Wild-type          |
| Frozen                                | Solid                                  | high grade         | sub-optimal                             | Wild-type          |
| Frozen                                | Solid                                  | high grade         | Sub-optimal                             | BRCA1 mutated      |
| <b>Chemotherapy treated specimens</b> |                                        |                    |                                         |                    |
| Fresh                                 | Solid                                  | high grade         | N/A                                     | Wild-type          |
| Fresh                                 | Solid                                  | high grade         | N/A                                     | BRCA2 mutated      |
| Fresh                                 | Solid                                  | high grade         | N/A                                     | Wild-type          |
| Fresh                                 | Solid                                  | high grade         | N/A                                     | Wild-type          |
| Fresh                                 | Solid                                  | high grade         | N/A                                     | Wild-type          |
| Fresh                                 | Ascites                                | high grade         | N/A                                     | Wild-type          |
| Fresh                                 | Solid                                  | high grade         | N/A                                     | Wild-type          |

**Supplementary Table 2. Results of limiting dilution analysis**

| <b>Specimen</b> | <b>Tumor Population</b> | <b>Tumor Initiating Frequency</b> | <b>95% CI</b>      |
|-----------------|-------------------------|-----------------------------------|--------------------|
| <b>Pt 1</b>     | Bulk                    | 1 in 170,000                      | 30,000-1,000,000   |
|                 | CA125 - cells           | 1 in 2,300                        | 570-9,600          |
|                 | CA125 + cells           | <1 in 740,000                     |                    |
| <b>Pt 2</b>     | Bulk                    | 1 in 24,000                       | 5,400-110,000      |
|                 | CA125 - cells           | 1 in 220                          | 49-960             |
|                 | CA125 + cells           | <1 in 770,000                     | 76,000-1,100,000   |
| <b>Pt 3</b>     | Bulk                    | 1 in 23,000                       | 5,700-96,000       |
|                 | CA125 - cells           | 1 in 670                          | 190-2,400          |
|                 | CA125 + cells           | 1 in 110,000                      | 27,000-430,000     |
| <b>Pt 4</b>     | Bulk                    | 1 in 11,000                       | 2,700-43,000       |
|                 | CA125 - cells           | 1 in 91                           | 21 - 390           |
|                 | CA125 + cells           | 1 in 840,000                      | 180,000-3,900,000  |
| <b>Pt 5</b>     | Bulk                    | 1 in 256,000                      | 48,000–1,350,000   |
|                 | CA125 - cells           | 1 in 23,000                       | 57,000–960,000     |
|                 | CA125 + cells           | <1 in 780,000                     |                    |
| <b>Pt 6</b>     | Bulk                    | <1 in 410,000                     | 260,000-12,000,000 |
|                 | CA125 - cells           | 1 in 51,000                       | 12,000-220,000     |
|                 | CA125 + cells           | <1 in 740,000 †                   |                    |
| <b>Pt 7</b>     | Bulk                    | 1 in 42,000 †                     | 12,000-150,000     |
|                 | CA125 - cells           | 1 in 1,100 †                      | 270-4300           |
|                 | CA125 + cells           | <1 in 670,000                     |                    |

† Indicates the median value for the group (i.e. Bulk, CA125 - or CA125 +)

**Supplementary Table 3. TP53 mutations detected by RNA sequencing**

| <b>Specimen</b> | <b>TP53 mutation detected</b> |                        |
|-----------------|-------------------------------|------------------------|
|                 | <b>CA125- fraction</b>        | <b>CA125+ fraction</b> |
| Pt A            | silenced                      | silenced               |
| Pt B            | C238Y                         | C238Y                  |
| Pt C            | silenced                      | silenced               |
| Pt D            | silenced                      | silenced               |
| Pt E            | V272M                         | V272M                  |
| Pt F            | R273H                         | R273H                  |
| Pt G            | R248W                         | R248W                  |
| Pt H            | H179N                         | H179N                  |
| Pt I            | H179R                         | H179R                  |
| Pt J            | S240G                         | S240G                  |

**Supplementary Table 4. Fold change in drug efflux transcripts**

| <b>Gene</b> | <b>Fold up or Down in<br/>CA125 - compared to<br/>CA125 + population</b> | <b>p adj</b> |
|-------------|--------------------------------------------------------------------------|--------------|
| ATP7A       | -1.04                                                                    | 0.66         |
| ATP7B       | 1.03                                                                     | 0.84         |
| SLC31A1     | 1.12                                                                     | 0.53         |
| GCSH        | -1.14                                                                    | 0.47         |
| MGST3       | 1.07                                                                     | 0.48         |
| ABCB11      | -1.54                                                                    | 0.65         |
| ABCB1       | -1.92                                                                    | 0.08         |
| ABCC1       | -1.09                                                                    | 0.19         |
| ABCC2       | 1.13                                                                     | 0.68         |
| ABCC3       | -1.51                                                                    | 0.04         |
| ABCC4       | 1.10                                                                     | 0.28         |
| ABCC5       | 1.04                                                                     | 0.78         |
| ABCC6       | -1.08                                                                    | 0.59         |
| ABCG2       | -1.28                                                                    | 0.12         |
| VDAC1       | -1.06                                                                    | 0.66         |
| MTF1        | 1.10                                                                     | 0.39         |
| MT1H        | 1.09                                                                     | 0.79         |

**Supplementary Table 5. Fold change in autophagy transcripts**

| <b>Gene</b> | <b>Fold up or Down in<br/>CA125 - compared to<br/>CA125 + population</b> | <b>p adj</b> |
|-------------|--------------------------------------------------------------------------|--------------|
| IFNG        | -1.61                                                                    | 0.29         |
| IFNA        | 1.06                                                                     | 0.87         |
| ULK1        | 1.01                                                                     | 0.95         |
| ATG13       | 1.01                                                                     | 0.91         |
| BECN1       | 1.01                                                                     | 0.85         |
| ATG12       | 1.02                                                                     | 0.80         |
| ATG14       | -1.08                                                                    | 0.55         |
| ATG7        | 1.07                                                                     | 0.40         |
| ATG10       | -1.02                                                                    | 0.88         |
| ATG4        | -1.07                                                                    | 0.47         |

Supplementary Table 6. Frequency or tumor foci in xenografts

| Experiment                                                     | Cell type                                       | Pre-therapy tumor | Treatment   | Tumor growth at completion of therapy | Tumor growth off therapy |
|----------------------------------------------------------------|-------------------------------------------------|-------------------|-------------|---------------------------------------|--------------------------|
| Subcutaneous xenografts with low-passage patient derived cells | S1 GODL                                         | yes               | Vehicle     | 5 of 5                                | 3 of 3                   |
|                                                                |                                                 |                   | Birinapant  | 5 of 5                                | 3 of 3                   |
|                                                                |                                                 |                   | Carboplatin | 4 of 5                                | 3 of 3                   |
|                                                                |                                                 |                   | Birin+Carbo | 0 of 5                                | 0 of 3                   |
|                                                                | S3-GODL                                         | yes               | Vehicle     | 4 of 4                                | 4 of 4                   |
|                                                                |                                                 |                   | Birinapant  | 3 of 4                                | 4 of 4                   |
|                                                                |                                                 |                   | Carboplatin | 4 of 4                                | 4 of 4                   |
|                                                                |                                                 |                   | Birin+Carbo | 3 of 4                                | 2 of 4                   |
|                                                                | S5-GODL                                         | yes               | Vehicle     | 4 of 4                                | 4 of 4                   |
|                                                                |                                                 |                   | Birinapant  | 4 of 4                                | 4 of 4                   |
|                                                                |                                                 |                   | Carboplatin | 4 of 4                                | 4 of 4                   |
|                                                                |                                                 |                   | Birin+Carbo | 1 of 4                                | 3 of 4                   |
|                                                                | S3-GODL Individual xenografst                   | yes               | Vehicle     | 3 of 3                                | 3 of 3                   |
|                                                                |                                                 |                   | Birinapant  | 3 of 3                                | 3 of 3                   |
|                                                                |                                                 |                   | Carboplatin | 3 of 3                                | 3 of 3                   |
|                                                                |                                                 |                   | Birin+Carbo | 1 of 3                                | 2 of 3                   |
| S5-GODL individual xenografts                                  | yes                                             | Vehicle           | 3 of 3      | 3 of 3                                |                          |
|                                                                |                                                 | Birinapant        | 3 of 3      | 3 of 3                                |                          |
|                                                                |                                                 | Carboplatin       | 3 of 3      | 3 of 3                                |                          |
|                                                                |                                                 | Birin+Carbo       | 0 of 3      | 0 of 3                                |                          |
| S1GODL Intraperitoneal tumors                                  | S1 GODL Pelvic wash pellet                      | yes               | Vehicle     | 4 of 4                                | 4 of 4                   |
|                                                                |                                                 |                   | Birinapant  | 4 of 4                                | 4 of 4                   |
|                                                                |                                                 |                   | Carboplatin | 1 of 4                                | 4 of 4                   |
|                                                                |                                                 |                   | Birin+Carbo | 0 of 4                                | 3 of 4                   |
|                                                                | S1-GODL Implants on organs                      | yes               | Vehicle     | 4 of 4                                | 4 of 4                   |
|                                                                |                                                 |                   | Birinapant  | 4 of 4                                | 4 of 4                   |
|                                                                |                                                 |                   | Carboplatin | 4 of 4                                | 4 of 4                   |
|                                                                |                                                 |                   | Birin+Carbo | 1 of 4                                | 2 of 4                   |
| Primary patient derived HGSC xenografts                        | Carboplatin sensitive<br>Birinapant sensitive   | yes               | Vehicle     | 3 of 3                                | 3 of 3                   |
|                                                                |                                                 |                   | Birinapant  | 3 of 3                                | 3 of 3                   |
|                                                                |                                                 |                   | Carboplatin | 3 of 3                                | 3 of 3                   |
|                                                                |                                                 |                   | Birin+Carbo | 3 of 5                                | 4 of 6                   |
|                                                                | Carboplatin sensitive<br>Birinapant insensitive | yes               | Vehicle     | 3 of 3                                | 3 of 3                   |
|                                                                |                                                 |                   | Birinapant  | 3 of 3                                | 3 of 3                   |
|                                                                |                                                 |                   | Carboplatin | 3 of 3                                | 3 of 3                   |
|                                                                |                                                 |                   | Birin+Carbo | 5 of 5                                | 5 of 5                   |
|                                                                | Carboplatin resistant<br>Birinapant sensitive   | yes               | Vehicle     | 2 of 2                                | 2 of 2                   |
|                                                                |                                                 |                   | Birinapant  | 2 of 2                                | 2 of 2                   |
|                                                                |                                                 |                   | Carboplatin | 3 of 3                                | 2 of 2                   |
|                                                                |                                                 |                   | Birin+Carbo | 1 of 3                                | 2 of 3                   |
| Carboplatin resistant<br>Birinapant insensitive                | yes                                             | Vehicle           | 3 of 3      | 3 of 3                                |                          |
|                                                                |                                                 | Birinapant        | 3 of 3      | 3 of 3                                |                          |
|                                                                |                                                 | Carboplatin       | 3 of 3      | 3 of 3                                |                          |
|                                                                |                                                 | Birin+Carbo       | 5 of 5      | 6 of 6                                |                          |

**Supplementary Table 7. Secreted proteins transcripts highly expressed in CA125- cells**

| ID              | Gene Symbol | Gene Description                                        | Fold increase over average |
|-----------------|-------------|---------------------------------------------------------|----------------------------|
| ENSG00000166710 | B2M         | beta-2-microglobulin                                    | 235.01                     |
| ENSG00000120885 | CLU         | clusterin                                               | 155.95                     |
| ENSG00000182718 | ANXA2       | annexin A2                                              | 118.84                     |
| ENSG00000169429 | IL8         | interleukin 8                                           | 93.96                      |
| ENSG00000124107 | SLPI        | secretory leukocyte peptidase inhibitor                 | 73.94                      |
| ENSG00000163739 | CXCL1       | chemokine (C-X-C motif) ligand 1                        | 41.01                      |
| ENSG00000058085 | LAMC2       | laminin, gamma 2                                        | 37.21                      |
| ENSG00000101443 | WFDC2       | WAP four-disulfide core domain 2                        | 32.53                      |
| ENSG00000108679 | LGALS3BP    | lectin, galactoside-binding, soluble, 3 binding protein | 32.42                      |
| ENSG00000113140 | SPARC       | secreted protein, acidic, cysteine-rich                 | 30.01                      |
| ENSG00000149131 | SERPING1    | serpin peptidase inhibitor, clade G, member 1           | 29.71                      |
| ENSG00000118785 | SPP1        | secreted phosphoprotein 1                               | 25.52                      |
| ENSG00000185499 | MUC1        | mucin 1, cell surface associated                        | 22.68                      |
| ENSG00000102265 | TIMP1       | TIMP metalloproteinase inhibitor 1                      | 22.59                      |
| ENSG00000119655 | NPC2        | Niemann-Pick disease, type C2                           | 21.46                      |
| ENSG00000137673 | MMP7        | matrix metalloproteinase 7 (matrilysin, uterine)        | 19.95                      |
| ENSG00000169245 | CXCL10      | chemokine (C-X-C motif) ligand 10                       | 18.62                      |
| ENSG00000115414 | FN1         | fibronectin 1                                           | 18.16                      |
| ENSG00000125730 | C3          | complement component 3                                  | 16.59                      |
| ENSG00000167244 | IGF2        | insulin-like growth factor 2 (somatomedin A)            | 15.74                      |
| ENSG00000167755 | KLK6        | kallikrein-related peptidase 6                          | 14.31                      |
| ENSG00000257017 | HP          | haptoglobin                                             | 13.15                      |
| ENSG00000115009 | CCL20       | chemokine (C-C motif) ligand 20                         | 12.77                      |
| ENSG00000175899 | A2M         | alpha-2-macroglobulin                                   | 12.36                      |
| ENSG00000133048 | CHI3L1      | chitinase 3-like 1 (cartilage glycoprotein-39)          | 12.34                      |
| ENSG00000169035 | KLK7        | kallikrein-related peptidase 7                          | 12.31                      |
| ENSG00000205403 | CFI         | complement factor I                                     | 12.15                      |
| ENSG00000100097 | LGALS1      | lectin, galactoside-binding, soluble, 1                 | 11.84                      |
| ENSG00000008517 | IL32        | interleukin 32                                          | 11.55                      |
| ENSG00000136689 | IL1RN       | interleukin 1 receptor antagonist                       | 10.77                      |
| ENSG00000164692 | COL1A2      | collagen, type I, alpha 2                               | 10.43                      |
| ENSG00000053747 | LAMA3       | laminin, alpha 3                                        | 10.31                      |
| ENSG00000110492 | MDK         | midkine (neurite growth-promoting factor 2)             | 10.24                      |
| ENSG00000030582 | GRN         | granulin                                                | 9.98                       |
| ENSG00000078401 | EDN1        | endothelin 1                                            | 9.77                       |
| ENSG00000047457 | CP          | ceruloplasmin (ferroxidase)                             | 9.44                       |
| ENSG00000148346 | LCN2        | lipocalin 2                                             | 9.41                       |
| ENSG00000104368 | PLAT        | plasminogen activator, tissue                           | 9.40                       |
| ENSG00000129538 | RNASE1      | ribonuclease, RNase A family, 1 (pancreatic)            | 8.70                       |
| ENSG00000211445 | GPX3        | glutathione peroxidase 3 (plasma)                       | 8.53                       |
| ENSG00000108821 | COL1A1      | collagen, type I, alpha 1                               | 8.08                       |
| ENSG00000081041 | CXCL2       | chemokine (C-X-C motif) ligand 2                        | 7.73                       |



**Supplementary Table 7 continued**

| ID              | Gene Symbol | Gene Description                               | Fold increase over average |
|-----------------|-------------|------------------------------------------------|----------------------------|
| ENSG00000021355 | SERPINB1    | serpin peptidase inhibitor, clade B, member 1  | 7.63                       |
| ENSG00000129277 | CCL4        | chemokine (C-C motif) ligand 4                 | 7.52                       |
| ENSG00000122861 | PLAU        | plasminogen activator, urokinase               | 6.68                       |
| ENSG00000115461 | IGFBP5      | insulin-like growth factor binding protein 5   | 6.60                       |
| ENSG00000168542 | COL3A1      | collagen, type III, alpha 1                    | 6.52                       |
| ENSG00000163734 | CXCL3       | chemokine (C-X-C motif) ligand 3               | 6.31                       |
| ENSG00000152268 | SPON1       | spondin 1, extracellular matrix protein        | 6.17                       |
| ENSG00000196878 | LAMB3       | laminin, beta 3                                | 6.15                       |
| ENSG00000197249 | SERPINA1    | serpin peptidase inhibitor, clade A, member 1  | 6.13                       |
| ENSG00000232810 | TNF         | tumor necrosis factor]                         | 5.83                       |
| ENSG00000052344 | PRSS8       | protease, serine, 8                            | 5.57                       |
| ENSG00000100342 | APOL1       | apolipoprotein L, 1                            | 5.40                       |
| ENSG00000135862 | LAMC1       | laminin, gamma 1 (formerly LAMB2)              | 5.28                       |
| ENSG00000106366 | SERPINE1    | serpin peptidase inhibitor, clade E, member 1  | 5.21                       |
| ENSG00000117122 | MFAP2       | microfibrillar-associated protein 2            | 4.89                       |
| ENSG00000166670 | MMP10       | matrix metalloproteinase 10 (stromelysin 2)    | 4.84                       |
| ENSG00000163430 | FSTL1       | follistatin-like 1                             | 4.80                       |
| ENSG00000100979 | PLTP        | phospholipid transfer protein                  | 4.64                       |
| ENSG00000161249 | DMKN        | dermokine                                      | 4.63                       |
| ENSG00000243649 | CFB         | complement factor B                            | 4.62                       |
| ENSG00000169218 | RSPO1       | R-spondin 1                                    | 4.58                       |
| ENSG00000146674 | IGFBP3      | insulin-like growth factor binding protein 3   | 4.46                       |
| ENSG00000011465 | DCN         | decorin                                        | 4.42                       |
| ENSG00000176945 | MUC20       | mucin 20, cell surface associated              | 4.33                       |
| ENSG00000125538 | IL1B        | interleukin 1, beta                            | 4.16                       |
| ENSG00000187608 | ISG15       | ISG15 ubiquitin-like modifier                  | 4.16                       |
| ENSG00000120509 | PDZD11      | PDZ domain containing 11                       | 4.00                       |
| ENSG00000167754 | KLK5        | kallikrein-related peptidase 5                 | 3.98                       |
| ENSG00000132581 | SDF2        | stromal cell-derived factor 2                  | 3.88                       |
| ENSG00000142871 | CYR61       | cysteine-rich, angiogenic inducer, 61          | 3.87                       |
| ENSG00000139329 | LUM         | lumican                                        | 3.81                       |
| ENSG00000006075 | CCL3        | chemokine (C-C motif) ligand 3                 | 3.79                       |
| ENSG00000129451 | KLK10       | kallikrein-related peptidase 10                | 3.78                       |
| ENSG00000124570 | SERPINB6    | serpin peptidase inhibitor, clade B , member 6 | 3.74                       |
| ENSG00000149257 | SERPINH1    | serpin peptidase inhibitor, clade H, member 1  | 3.58                       |
| ENSG00000168081 | PNOC        | prepronociceptin                               | 3.53                       |
| ENSG00000129455 | KLK8        | kallikrein-related peptidase 8                 | 3.53                       |
| ENSG00000000971 | CFH         | complement factor H                            | 3.35                       |
| ENSG00000204983 | PRSS1       | protease, serine, 1 (trypsin 1)                | 3.32                       |
| ENSG00000177830 | CHID1       | chitinase domain containing 1                  | 3.20                       |
| ENSG00000118523 | CTGF        | connective tissue growth factor                | 3.13                       |
| ENSG00000108691 | CCL2        | chemokine (C-C motif) ligand 2                 | 3.12                       |

**Supplementary Table 8. Cell surface transcripts highly expressed in CA125- cells**

| ID              | Gene Symbol | Gene Description                                     | Fold increase over average |
|-----------------|-------------|------------------------------------------------------|----------------------------|
| ENSG00000139644 | TMBIM6      | transmembrane BAX inhibitor motif containing 6       | 125.851                    |
| ENSG0000019582  | CD74        | CD74 molecule, MHC, class II invariant chain         | 112.4152                   |
| ENSG00000165949 | IFI27       | interferon, alpha-inducible protein 27               | 74.57614                   |
| ENSG0000013588  | GPRC5A      | G protein-coupled receptor, familyC, group5, memberA | 71.80903                   |
| ENSG00000169908 | TM4SF1      | transmembrane 4 L six family member 1                | 68.68447                   |
| ENSG0000010278  | CD9         | CD9 molecule                                         | 60.34071                   |
| ENSG00000142089 | IFITM3      | interferon induced transmembrane protein 3           | 60.13627                   |
| ENSG00000135404 | CD63        | CD63 molecule                                        | 46.66773                   |
| ENSG00000124145 | SDC4        | syndecan 4                                           | 42.39918                   |
| ENSG00000185885 | IFITM1      | interferon induced transmembrane protein 1           | 40.32192                   |
| ENSG0000011422  | PLAUR       | plasminogen activator, urokinase receptor            | 36.51154                   |
| ENSG00000118705 | RPN2        | ribophorin II                                        | 35.69502                   |
| ENSG00000110195 | FOLR1       | folate receptor 1 (adult)                            | 35.67795                   |
| ENSG00000204287 | HLA-DRA     | major histocompatibility complex, class II, DR alpha | 34.13535                   |
| ENSG00000068697 | LAPTM4A     | lysosomal protein transmembrane 4 alpha              | 33.55634                   |
| ENSG00000185825 | BCAP31      | B-cell receptor-associated protein 31                | 29.29265                   |
| ENSG00000135535 | CD164       | CD164 molecule, sialomucin                           | 27.87156                   |
| ENSG00000116209 | TMEM59      | transmembrane protein 59                             | 27.14167                   |
| ENSG00000169242 | EFNA1       | ephrin-A1                                            | 25.45083                   |
| ENSG00000125991 | ERGIC3      | ERGIC and golgi 3                                    | 23.85719                   |
| ENSG00000137575 | SDCBP       | syndecan binding protein (syntenin)                  | 23.28259                   |
| ENSG00000170348 | TMED10      | transmembrane emp24-like trafficking protein 10      | 22.81517                   |
| ENSG00000185499 | MUC1        | mucin 1, cell surface associated                     | 22.67739                   |
| ENSG00000085063 | CD59        | CD59 molecule, complement regulatory protein         | 22.50912                   |
| ENSG00000165678 | GHITM       | growth hormone inducible transmembrane protein       | 22.32091                   |
| ENSG00000204592 | HLA-E       | major histocompatibility complex, class I, E         | 21.31001                   |
| ENSG00000185201 | IFITM2      | interferon induced transmembrane protein 2           | 21.05689                   |
| ENSG00000136235 | GNPMB       | glycoprotein (transmembrane) nmb                     | 21.05378                   |
| ENSG00000167642 | SPINT2      | serine peptidase inhibitor, Kunitz type, 2           | 20.10767                   |
| ENSG00000105855 | ITGB8       | integrin, beta 8                                     | 19.52254                   |
| ENSG00000181061 | HIGD1A      | HIG1 hypoxia inducible domain family, member 1A      | 19.25614                   |
| ENSG00000129562 | DAD1        | defender against cell death 1                        | 19.03397                   |
| ENSG00000189143 | CLDN4       | claudin 4                                            | 18.2351                    |
| ENSG00000197747 | S100A10     | S100 calcium binding protein A10                     | 17.40676                   |
| ENSG00000134531 | EMP1        | epithelial membrane protein 1                        | 17.28867                   |
| ENSG00000039068 | CDH1        | cadherin 1, type 1, E-cadherin (epithelial)          | 17.15879                   |
| ENSG00000134910 | STT3A       | STT3A, subunit of oligosaccharyltransferase complex  | 16.6755                    |
| ENSG00000234745 | HLA-B       | major histocompatibility complex, class I, B         | 16.64644                   |
| ENSG00000130164 | LDLR        | low density lipoprotein receptor                     | 16.08072                   |
| ENSG00000137648 | TMPRSS4     | transmembrane protease, serine 4                     | 15.69976                   |
| ENSG00000169905 | TOR1AIP2    | torsin A interacting protein 2                       | 15.60887                   |
| ENSG00000117394 | SLC2A1      | solute carrier family 2 member 1                     | 15.18917                   |

**Supplementary Table 8 continued**

| ID              | Gene Symbol | Gene Description                                                         | Fold increase over average |
|-----------------|-------------|--------------------------------------------------------------------------|----------------------------|
| ENSG00000154639 | CXADR       | coxsackie virus and adenovirus receptor                                  | 15.18358                   |
| ENSG00000124783 | SSR1        | signal sequence receptor, alpha                                          | 14.72424                   |
| ENSG00000143153 | ATP1B1      | ATPase, Na <sup>+</sup> /K <sup>+</sup> transporting, beta 1 polypeptide | 13.25801                   |
| ENSG00000125304 | TM9SF2      | transmembrane 9 superfamily member 2                                     | 13.00742                   |
| ENSG00000213853 | EMP2        | epithelial membrane protein 2                                            | 12.92196                   |
| ENSG00000172270 | BSG         | basigin                                                                  | 12.72395                   |
| ENSG00000113361 | CDH6        | cadherin 6, type 2, K-cadherin (fetal kidney)                            | 12.68145                   |
| ENSG00000196776 | CD47        | CD47 molecule                                                            | 12.57096                   |
| ENSG00000090339 | ICAM1       | intercellular adhesion molecule 1                                        | 12.46299                   |
| ENSG00000112149 | CD83        | CD83 molecule                                                            | 12.09943                   |
| ENSG00000114638 | UPK1B       | uroplakin 1B                                                             | 11.90432                   |
| ENSG00000105426 | PTPRS       | protein tyrosine phosphatase, receptor type, S                           | 11.1177                    |
| ENSG00000204525 | HLA-C       | major histocompatibility complex, class I, C                             | 10.99562                   |
| ENSG00000206503 | HLA-A       | major histocompatibility complex, class I, A                             | 10.90217                   |
| ENSG00000134294 | SLC38A2     | solute carrier family 38, member 2                                       | 10.83701                   |
| ENSG00000179820 | MYADM       | myeloid-associated differentiation marker                                | 10.82139                   |
| ENSG00000150093 | ITGB1       | integrin, beta 1                                                         | 10.61463                   |
| ENSG00000143727 | ACP1        | acid phosphatase 1, soluble                                              | 10.42087                   |
| ENSG00000113946 | CLDN16      | claudin 16                                                               | 10.29632                   |
| ENSG00000157765 | SLC34A2     | solute carrier family 34, member 2                                       | 10.20975                   |
| ENSG00000111371 | SLC38A1     | solute carrier family 38, member 1                                       | 10.19108                   |
| ENSG00000231389 | HLA-DPA1    | major histocompatibility complex, class II, DP alpha 1                   | 10.14166                   |
| ENSG00000111897 | SERINC1     | serine incorporator 1                                                    | 10.09344                   |
| ENSG00000171105 | INSR        | insulin receptor                                                         | 9.853426                   |
| ENSG00000138449 | SLC40A1     | solute carrier family 40, member 1                                       | 9.618246                   |
| ENSG00000184697 | CLDN6       | claudin 6                                                                | 9.611796                   |
| ENSG00000109133 | TMEM33      | transmembrane protein 33                                                 | 9.55983                    |
| ENSG00000196126 | HLA-DRB1    | major histocompatibility complex, class II, DR beta 1                    | 9.456549                   |
| ENSG00000135926 | TMBIM1      | transmembrane BAX inhibitor motif containing 1                           | 9.342031                   |
| ENSG00000117335 | CD46        | CD46 molecule, complement regulatory protein                             | 9.283966                   |
| ENSG00000143183 | TMCO1       | transmembrane and coiled-coil domains 1                                  | 9.17432                    |
| ENSG00000117472 | TSPAN1      | tetraspanin 1                                                            | 9.05854                    |
| ENSG00000129353 | SLC44A2     | solute carrier family 44, member 2                                       | 8.826502                   |
| ENSG00000126709 | IFI6        | interferon, alpha-inducible protein 6                                    | 8.823432                   |
| ENSG00000111843 | TMEM14C     | transmembrane protein 14C                                                | 8.789676                   |
| ENSG00000114023 | FAM162A     | family with sequence similarity 162, member A                            | 8.787756                   |
| ENSG00000181885 | CLDN7       | claudin 7                                                                | 8.761999                   |
| ENSG00000129625 | REEP5       | receptor accessory protein 5                                             | 8.593896                   |
| ENSG00000008282 | SYPL1       | synaptophysin-like 1                                                     | 8.266035                   |
| ENSG00000072274 | TFRC        | transferrin receptor                                                     | 8.22994                    |
| ENSG00000144136 | SLC20A1     | coxsackie virus and adenovirus receptor                                  | 8.021186                   |
| ENSG00000134291 | TMEM106     | transmembrane protein 106C                                               | 7.720262                   |

**Supplementary Table 8 continued**

| ID              | Gene Symbol | Gene Description                                                          | Fold increase over average |
|-----------------|-------------|---------------------------------------------------------------------------|----------------------------|
| ENSG00000091317 | CMTM6       | CKLF-like MARVEL transmembrane domain containing 6                        | 7.678553                   |
| ENSG00000132824 | SERINC3     | serine incorporator 3                                                     | 7.671082                   |
| ENSG00000147676 | MAL2        | mal, T-cell differentiation protein 2 (gene/pseudogene)                   | 7.562574                   |
| ENSG00000137207 | YIPF3       | Yip1 domain family, member 3                                              | 7.261396                   |
| ENSG00000167601 | AXL         | AXL receptor tyrosine kinase                                              | 7.22305                    |
| ENSG00000184292 | TACSTD2     | tumor-associated calcium signal transducer 2                              | 7.22198                    |
| ENSG00000102158 | MAGT1       | magnesium transporter 1                                                   | 7.188333                   |
| ENSG00000026508 | CD44        | CD44 molecule (Indian blood group)                                        | 7.138366                   |
| ENSG00000170458 | CD14        | CD14 molecule                                                             | 7.12119                    |
| ENSG00000085117 | CD82        | CD82 molecule                                                             | 7.057445                   |
| ENSG00000162736 | NCSTN       | nicastrin                                                                 | 6.971713                   |
| ENSG00000163814 | CDCP1       | CUB domain containing protein 1                                           | 6.839487                   |
| ENSG00000163399 | ATP1A1      | ATPase, Na <sup>+</sup> /K <sup>+</sup> transporting, alpha 1 polypeptide | 6.835893                   |
| ENSG00000000003 | TSPAN6      | tetraspanin 6                                                             | 6.728886                   |
| ENSG00000074696 | PTPLAD1     | protein tyrosine phosphatase-likeA domain containing1                     | 6.61852                    |
| ENSG00000168542 | COL3A1      | collagen, type III, alpha 1                                               | 6.522386                   |
| ENSG00000162366 | PDZK1IP1    | PDZK1 interacting protein 1                                               | 6.502222                   |
| ENSG00000163347 | CLDN1       | claudin 1                                                                 | 6.39276                    |
| ENSG00000138069 | RAB1A       | RAB1A, member RAS oncogene family                                         | 6.368703                   |
| ENSG00000110660 | SLC35F2     | solute carrier family 35, member F2                                       | 6.288557                   |
| ENSG00000136238 | RAC1        | rho family, small GTP binding protein Rac1                                | 6.276329                   |
| ENSG00000168003 | SLC3A2      | solute carrier family 3, member 2                                         | 6.271377                   |
| ENSG00000143570 | SLC39A1     | solute carrier family 39 (zinc transporter), member 1                     | 6.238133                   |
| ENSG00000139163 | ETNK1       | ethanolamine kinase 1                                                     | 6.223001                   |
| ENSG00000205155 | PSENEN      | presenilin enhancer gamma secretase subunit                               | 6.163673                   |
| ENSG00000075420 | FNDC3B      | fibronectin type III domain containing 3B                                 | 6.031554                   |
| ENSG00000027697 | IFNGR1      | interferon gamma receptor 1                                               | 6.016456                   |
| ENSG00000005486 | RHBDD2      | rhomboid domain containing 2                                              | 6.009283                   |
| ENSG00000126353 | CCR7        | chemokine (C-C motif) receptor 7                                          | 5.981219                   |
| ENSG00000080822 | CLDND1      | claudin domain containing 1                                               | 5.933509                   |
| ENSG00000143771 | CNIH4       | cornichon family AMPA receptor auxiliary protein 4                        | 5.916299                   |
| ENSG00000127838 | PNKD        | paroxysmal nonkinesigenic dyskinesia                                      | 5.828717                   |
| ENSG00000158769 | F11R        | F11 receptor                                                              | 5.730896                   |
| ENSG00000116521 | SCAMP3      | secretory carrier membrane protein 3                                      | 5.625128                   |
| ENSG00000185475 | TMEM179     | transmembrane protein 179B                                                | 5.417608                   |
| ENSG00000100342 | APOL1       | apolipoprotein L, 1                                                       | 5.403007                   |
| ENSG00000142949 | PTPRF       | protein tyrosine phosphatase, receptor type, F                            | 5.398767                   |
| ENSG00000223865 | HLA-DPB1    | major histocompatibility complex, class II, DP beta 1                     | 5.377537                   |
| ENSG00000168615 | ADAM9       | ADAM metallopeptidase domain 9                                            | 5.32102                    |
| ENSG00000012660 | ELOVL5      | ELOVL fatty acid elongase 5                                               | 5.273359                   |
| ENSG00000058668 | ATP2B4      | ATPase, Ca <sup>++</sup> transporting, plasma membrane 4                  | 5.232003                   |
| ENSG00000137642 | SORL1       | sortilin-related receptor, L Arepeats containing                          | 5.231004                   |

**Supplementary Table 8 continued**

| ID              | Gene Symbol | Gene Description                                         | Fold increase over average |
|-----------------|-------------|----------------------------------------------------------|----------------------------|
| ENSG00000162896 | PIGR        | polymeric immunoglobulin receptor                        | 5.227802                   |
| ENSG00000003056 | M6PR        | mannose-6-phosphate receptor (cation dependent)          | 5.224203                   |
| ENSG00000146066 | HIGD2A      | HIG1 hypoxia inducible domain family, member 2A          | 5.152918                   |
| ENSG00000165029 | ABCA1       | ATP-binding cassette, sub-family A (ABC1), member 1      | 5.151048                   |
| ENSG00000204385 | SLC44A4     | solute carrier family 44, member 4                       | 5.127177                   |
| ENSG00000170876 | TMEM43      | transmembrane protein 43                                 | 5.09721                    |
| ENSG00000112378 | PERP        | PERP, TP53 apoptosis effector                            | 5.093402                   |
| ENSG00000108639 | SYNGR2      | synaptogyrin 2                                           | 5.065162                   |
| ENSG00000162695 | SLC30A7     | solute carrier family 30 (zinc transporter), member 7    | 4.985954                   |
| ENSG00000142166 | IFNAR1      | interferon (alpha, beta and omega) receptor 1            | 4.977811                   |
| ENSG00000080815 | PSEN1       | presenilin 1                                             | 4.925619                   |
| ENSG00000134247 | PTGFRN      | prostaglandin F2 receptor inhibitor                      | 4.922035                   |
| ENSG00000136156 | ITM2B       | integral membrane protein 2B                             | 4.912385                   |
| ENSG00000105974 | CAV1        | caveolin 1, caveolae protein, 22kDa                      | 4.886942                   |
| ENSG00000140497 | SCAMP2      | secretory carrier membrane protein 2                     | 4.87308                    |
| ENSG00000181704 | YIPF6       | Yip1 domain family, member 6                             | 4.834596                   |
| ENSG00000197822 | OCLN        | occludin                                                 | 4.777913                   |
| ENSG00000106565 | TMEM176     | transmembrane protein 176B                               | 4.72775                    |
| ENSG00000137845 | ADAM10      | ADAM metallopeptidase domain 10                          | 4.723125                   |
| ENSG00000034677 | RNF19A      | ring finger protein 19A, RBR E3 ubiquitin protein ligase | 4.598878                   |
| ENSG00000146416 | AIG1        | androgen-induced 1                                       | 4.595464                   |
| ENSG00000133195 | SLC39A11    | solute carrier family 39, member 11                      | 4.582642                   |
| ENSG00000100647 | KIAA0247    | KIAA0247                                                 | 4.530086                   |
| ENSG00000059804 | SLC2A3      | solute carrier family 2, member 3                        | 4.496145                   |
| ENSG00000132965 | ALOX5AP     | arachidonate 5-lipoxygenase-activating protein           | 4.478591                   |
| ENSG00000108219 | TSPAN14     | tetraspanin 14                                           | 4.468295                   |
| ENSG00000103978 | TMEM87A     | transmembrane protein 87A                                | 4.433643                   |
| ENSG00000133872 | TMEM66      | transmembrane protein 66                                 | 4.422698                   |
| ENSG00000006327 | TNFRSF12    | TNF receptor superfamily, member 12A                     | 4.421859                   |
| ENSG00000119888 | EPCAM       | epithelial cell adhesion molecule                        | 4.396973                   |
| ENSG00000101294 | HM13        | histocompatibility (minor) 13                            | 4.396281                   |
| ENSG00000119977 | TCTN3       | tectonic family member 3                                 | 4.384337                   |
| ENSG00000176945 | MUC20       | mucin 20, cell surface associated                        | 4.334188                   |
| ENSG00000128335 | APOL2       | apolipoprotein L, 2                                      | 4.331177                   |
| ENSG00000183726 | TMEM50A     | transmembrane protein 50A                                | 4.281261                   |
| ENSG00000204257 | HLA-DMA     | major histocompatibility complex, class II, DM alpha     | 4.240712                   |
| ENSG00000184743 | ATL3        | atlastin GTPase 3                                        | 4.214914                   |
| ENSG00000142627 | EPHA2       | EPH receptor A2                                          | 4.183465                   |
| ENSG00000105518 | TMEM205     | transmembrane protein 205                                | 4.177423                   |
| ENSG00000174695 | TMEM167     | transmembrane protein 167A                               | 4.164421                   |
| ENSG00000096092 | TMEM14A     | transmembrane protein 14A                                | 4.088931                   |
| ENSG00000169508 | GPR183      | G protein-coupled receptor 183                           | 4.063207                   |

**Supplementary Table 8 continued**

| ID              | Gene Symbol | Gene Description                                   | Fold increase over average |
|-----------------|-------------|----------------------------------------------------|----------------------------|
| ENSG00000112759 | SLC29A1     | solute carrier family 29 , member 1                | 4.058243                   |
| ENSG00000140391 | TSPAN3      | tetraspanin 3                                      | 4.02287                    |
| ENSG00000177674 | AGTRAP      | angiotensin II receptor-associated protein         | 3.983371                   |
| ENSG00000064651 | SLC12A2     | solute carrier family 12, member 2                 | 3.948087                   |
| ENSG00000149932 | TMEM219     | transmembrane protein 219                          | 3.929019                   |
| ENSG00000213625 | LEPROT      | leptin receptor overlapping transcript [           | 3.926181                   |
| ENSG00000168216 | LMBRD1      | LMBR1 domain containing 1                          | 3.881611                   |
| ENSG00000125107 | CNOT1       | CCR4-NOT transcription complex, subunit 1          | 3.846612                   |
| ENSG00000148175 | STOM        | stomatin                                           | 3.822353                   |
| ENSG00000213064 | SFT2D2      | SFT2 domain containing 2                           | 3.790306                   |
| ENSG00000113583 | C5orf15     | chromosome 5 open reading frame 15                 | 3.786403                   |
| ENSG00000101337 | TM9SF4      | transmembrane 9 superfamily protein member 4       | 3.779673                   |
| ENSG00000121073 | SLC35B1     | solute carrier family 35, member B1                | 3.745886                   |
| ENSG00000134873 | CLDN10      | claudin 10                                         | 3.736479                   |
| ENSG00000144063 | MALL        | mal, T-cell differentiation protein-like           | 3.715467                   |
| ENSG00000205336 | GPR56       | G protein-coupled receptor 56                      | 3.70202                    |
| ENSG00000136868 | SLC31A1     | solute carrier family 31 , member 1                | 3.667986                   |
| ENSG00000110651 | CD81        | CD81 molecule                                      | 3.66385                    |
| ENSG00000110848 | CD69        | CD69 molecule                                      | 3.627589                   |
| ENSG00000140395 | WDR61       | WD repeat domain 61                                | 3.618967                   |
| ENSG00000166619 | BLCAP       | bladder cancer associated protein                  | 3.61441                    |
| ENSG00000137393 | RNF144B     | ring finger protein 144B                           | 3.57046                    |
| ENSG00000159346 | ADIPOR1     | adiponectin receptor 1                             | 3.514508                   |
| ENSG00000152558 | TMEM123     | transmembrane protein 123                          | 3.486441                   |
| ENSG00000145817 | YIPF5       | Yip1 domain family, member 5                       | 3.471341                   |
| ENSG00000104549 | SQLE        | squalene epoxidase                                 | 3.464289                   |
| ENSG00000105677 | TMEM147     | transmembrane protein 147                          | 3.459103                   |
| ENSG00000112697 | TMEM30A     | transmembrane protein 30A                          | 3.446519                   |
| ENSG00000153292 | GPR110      | G protein-coupled receptor 110                     | 3.442113                   |
| ENSG00000204308 | RNF5        | ring finger protein 5, E3 ubiquitin protein ligase | 3.413003                   |
| ENSG00000162511 | LAPTM5      | lysosomal protein transmembrane 5                  | 3.411439                   |
| ENSG00000142188 | TMEM50B     | transmembrane protein 50B                          | 3.406173                   |
| ENSG00000177697 | CD151       | CD151 molecule (Raph blood group)                  | 3.380418                   |
| ENSG00000166145 | SPINT1      | serine peptidase inhibitor, Kunitz type 1          | 3.357697                   |
| ENSG00000176485 | PLA2G16     | phospholipase A2, group XVI                        | 3.334547                   |
| ENSG00000156642 | NPTN        | neuroplastin                                       | 3.324737                   |
| ENSG00000186501 | TMEM222     | transmembrane protein 222                          | 3.318324                   |
| ENSG00000104067 | TJP1        | tight junction protein 1                           | 3.315734                   |
| ENSG00000143753 | DEGS1       | delta(4)-desaturase, sphingolipid 1                | 3.306819                   |
| ENSG00000198715 | C1orf85     | chromosome 1 open reading frame 85                 | 3.284892                   |
| ENSG00000168924 | LETM1       | leucine zipper-EF-hand transmembrane protein 1     | 3.281466                   |
| ENSG00000127526 | SLC35E1     | solute carrier family 35, member E1                | 3.262275                   |

**Supplementary Table 8 continued**

| ID              | Gene Symbol | Gene Description                                       | Fold increase over average |
|-----------------|-------------|--------------------------------------------------------|----------------------------|
| ENSG00000155659 | VSIG4       | V-set and immunoglobulin domain containing 4           | 3.238534                   |
| ENSG00000102471 | NDFIP2      | Nedd4 family interacting protein 2                     | 3.21989                    |
| ENSG00000089327 | FXYD5       | FXYD domain containing ion transport regulator 5       | 3.187626                   |
| ENSG00000172005 | MAL         | mal, T-cell differentiation protein                    | 3.153905                   |
| ENSG00000135750 | KCNK1       | potassium channel, subfamily K, member 1               | 3.134131                   |
| ENSG00000117525 | F3          | coagulation factor III (thromboplastin, tissue factor) | 3.131976                   |
| ENSG00000160789 | LMNA        | lamin A/C                                              | 3.126175                   |
| ENSG00000110911 | SLC11A2     | solute carrier family 11, member 2                     | 3.125207                   |
| ENSG00000077147 | TM9SF3      | transmembrane 9 superfamily member 3                   | 3.119944                   |
| ENSG00000105223 | PLD3        | phospholipase D family, member 3                       | 3.108245                   |
| ENSG00000182985 | CADM1       | cell adhesion molecule 1                               | 3.080628                   |
| ENSG00000116299 | KIAA1324    | KIAA1324                                               | 3.053857                   |
| ENSG00000198818 | SFT2D1      | SFT2 domain containing 1                               | 3.051243                   |
| ENSG00000002586 | CD99        | CD99 molecule                                          | 3.050298                   |
| ENSG00000111711 | GOLT1B      | golgi transport 1B                                     | 3.021777                   |
| ENSG00000184277 | TM2D3       | TM2 domain containing 3                                | 3.011987                   |

**Supplementary Table 9. Antibodies used for FACS**

|                                                |               |             |
|------------------------------------------------|---------------|-------------|
| Anti-CA125 (clone OC125)                       | Abcam         | ab693       |
| Anti-human CD31 – FITC/PE.Cy7 (clone WM59)     | eBioscience   | 11-/25-0139 |
| Anti-human CD45 - FITC/PE.Cy7 (clone HI30)     | eBioscience   | 11-/25-0459 |
| Anti-human CD235a - FITC (clone HIR2)          | eBioscience   | 11-9998     |
| Anti-human CD235a - FITC (clone HI264)         | Biolegend     | VII 70312   |
| Anti-mouse CD31 – PE.Cy7 (clone 390 )          | eBioscience   | 25-0311     |
| Anti-mouse CD45 - PE.Cy7 (clone 30-F11 )       | eBioscience   | 25-0451     |
| Anti-mouse Ter119 - PE.Cy7 (clone TER-119 )    | eBioscience   | 25-5921     |
| Alexa-594 anti-mouse                           | Invitrogen    | A-21203     |
| Alexa-660 anti-mouse                           | Invitrogen    | A-21054     |
| Anti-human EpCAM – efluor660 (Clone 1B7)       | eBioscience   | 50-9326     |
| Anti-human CD10-PE.Cy7 (clone SN5c)            | eBioscience   | 25-0106     |
| Anti-human CD44-PE (clone IM7)                 | eBioscience   | 12-0441     |
| Anti-human CD49f-PerCP.efluor 770 (clone GoH3) | eBioscience   | 46-0495     |
| Propidium Iodide                               | Invitrogen    | P3566       |
| Annexin V - FITC                               | BD Bioscience | 556420      |

**Supplementary Table 10. Antibodies used for immunohistochemistry**

|                                      |                    |             |        |
|--------------------------------------|--------------------|-------------|--------|
| Anti-CA125 (clone M11)               | Dako               | M3520       | 1:50   |
| Anti-CA125 (clone EPSISR23)          | Abcam              | ab134093    | 1:50   |
| Anti-TP53 (clone DO-1)               | Santa Cruz         | sc-126      | 1:200  |
| Anti-Pax8                            | ProteinTech        | 10336-1-AP  | 1:1000 |
| Anti-γH2AX (Ser139) (clone 20E3)     | Cell Signaling     | 9718        | 1:400  |
| Anti-GFP                             | Gift from ON Witte |             | 1:500  |
| Alexa-594 anti-mouse                 | Invitrogen         | A-21203     | 1:1000 |
| Alexa-594 anti-rabbit                | Invitrogen         | A-21074     | 1:1000 |
| Biotinylated anti-mouse              | Vector             | BMK-2202    | 1:1000 |
| Biotinylated anti-rabbit             | Jackson IR         | 111-065-003 | 1:1000 |
| SA-fluorescein isothiocyanate (FITC) | Jackson IR         | 016-010-084 | 1:1000 |
| SA-horseradish peroxidase            | Jackson IR         | 016-030-084 | 1:1000 |



**Supplementary Table 11. Antibodies used for western blot**

|                             |                |          |         |
|-----------------------------|----------------|----------|---------|
| Anti-ERK                    | Santa Cruz     | sc-154   | 1:5000  |
| Anti-CA125                  | Abcam          | ab134093 | 1:10000 |
| Anti-Rad51                  | Santa Cruz     | ab693    | 1:200   |
| Anti-E2F1                   | Abcam          | ab4070   | 1:200   |
| Anti-Fas                    | Abcam          | ab15285  | 1:500   |
| Anti-FADD                   | Santa Cruz     | sc-5559  | 1:100   |
| Anti-pan cIAP               | R&D            | MAB3400  | 1:500   |
| Anti-cIAP1                  | Abcam          | ab108361 | 1:1000  |
| Anti-cIAP2                  | Abcam          | ab137393 | 1:1000  |
| Anti-NF- $\kappa$ B         | Cell Signaling | 8242     | 1:1000  |
| Anti-phospho-NF- $\kappa$ B | Cell Signaling | 3033     | 1:1000  |
| Anti-PARP                   | Cell Signaling | 9592     | 1:1000  |
| Anti-XIAP                   | BD Bioscience  | 610716   | 1:1000  |
| Anti-caspase 8              | Cell Signaling | 9746     | 1:1000  |
| Biotinylated anti-mouse     | Bio-Rad        | 170-6515 | 1:4000  |
| Biotinylated anti-rabbit    | Bio-Rad        | 170-6516 | 1:4000  |

**Supplementary Table 12. Quantitative-PCR primer sets**

|         |                              |
|---------|------------------------------|
| CA125 F | 5'-ACCCAGCTGCAGAACTTCA-3'    |
| CA125 R | 5'-GGTAGTAGCCTGGGCACTGT-3'   |
| GAPDH F | 5'-AGCCACATCGCTCAGACAC-3'    |
| GAPDH R | 5'-GAGGCATTGCTGATGATCTTG-3'  |
| cIAP1 F | 5'-AGGTGTGAGTTCTTGATACGAA-3' |
| cIAP1 R | 5'-TTGTTTCACCAGGTCTCTATTA-3' |
| cIAP2 F | 5'-AGGTGTTGGGAATCTGGAGAT-3'  |
| cIAP2 R | 5'-GCAGCATTAAATCACAGGAGTA-3' |
